# Supplementary material for: Synthesis, structure, and reactivity of uranium(vi) nitrides
Source: Royal Society of Chemistry journal article supplement (doi:10.1039/d1sc01796a), 2021-01-01
Supplement: d1sc01796a1.pdf [file d1sc01796a1.pdf]

## Synthesis, Structure, and Reactivity of Uranium(VI) Nitrides

Luciano Barluzzi, Fang-Che Hsueh, Rosario Scopelliti, Benjamin Atkinson, Nikolas Kaltsoyannis, and Marinella Mazzanti \*

*Institut des Sciences et Ingénierie Chimiques, Ecole Polytechnique Fédérale de Lausanne (EPFL), 1015 Lausanne, Switzerland*

*Department of Chemistry, University of Manchester, Oxford Road, Manchester, M13 9PL, UK*

### Electronic Supplementary Information (ESI)

#### Table of Contents

|                                                          |    |
|----------------------------------------------------------|----|
| Materials and Methods .....                              | 2  |
| NMR Spectra .....                                        | 12 |
| X-ray Crystallographic Details and Refinement Data ..... | 31 |
| IR Spectra .....                                         | 36 |
| GC-MS experiment .....                                   | 38 |
| Computational Details .....                              | 39 |
| References .....                                         | 41 |

## Materials and Methods

**General Considerations.** The syntheses and manipulations described below were conducted under argon or nitrogen with rigorous exclusion of air and water using an MBraun glovebox equipped with a purifier unit that kept oxygen and water level below 0.1 ppm along with vacuum and Schlenk line techniques. Glassware was dried at 150°C before use. Anhydrous solvents were purchased from Aldrich and further distilled from K/benzophenone (THF, toluene). Depleted uranium turnings were purchased from IBILABS, Florida (USA). Deuterated solvents for NMR spectroscopy ( $d_8$ -thf,  $d_8$ -toluene) were purchased from Cortecnet, freeze-degassed and distilled over K/benzophenone.  $d_6$ -dmso was freeze-degassed and dried over 3 Å molecular sieves for several days. Unless otherwise noted, reagents were purchased from commercial suppliers and used as received.  $[K_2\{U(OSi(O^tBu)_3)_3(\mu-N)\}_2]$ , **1**,<sup>1</sup>  $[K_2\{U(OSi(O^tBu)_3)_3(\mu-NH)\}_2]$ , **6**,<sup>1</sup>  $NEt_3HBPh_4$ ,<sup>2</sup> and  $AgBPh_4$ <sup>3</sup> were prepared as previously described. CO (N47 Bt-S 10/200) was purchased from Carbagas and stored over activated 3 Å molecular sieves.  $H_2$  (99.9999% purity) was purchased from Carbagas.  $^{13}CO$  (93.13%  $^{13}C$ ) and  $D_2$  (99.8% D) were purchased from Cortecnet and transferred to a flask containing activated 3 Å molecular sieves prior to use. Elemental analyses were performed under nitrogen with a ThermoScientific Flash 2000 Organic Elemental Analyzer. NMR experiments were carried out using NMR tubes adapted with J. Young valves.  $^1H$  and  $^{13}C$  spectra were recorded using Avance 400 MHz ( $^{13}C$  125 MHz) or Avance III-HD 600 MHz ( $^{13}C$  151 MHz) NMR spectrometers and chemical shifts were referenced internally to residual proteo-solvent references.

**Caution:** Depleted uranium (primary isotope  $^{238}U$ ) is a weak  $\alpha$ -emitter (4.197 MeV) with a half-life of  $4.47 \times 10^9$  years. Manipulations and reactions should be carried out in monitored fume hoods or in an inert glovebox in a radiation laboratory equipped with  $\alpha$ - and  $\beta$ -counting equipment.

### GC-MS experiments.

GC-MS analysis of headspace from the decomposition reaction of isolated complex **4** was performed under Ar using a Thermo Fisher Trace 1300 GC equipped with a TGBond Msieve 5A column (30m x 0.32 mm x 30  $\mu$ m) coupled to Thermo Fisher TSQ8000 MS. The reaction was conducted in a J-Young adapted NMR tube. The headspace was recovered with a syringe from a septum and immediately injected into the instrument. Control experiment were carried out by injecting headspace from solutions of complex **2** (which does not release N<sub>2</sub>).

### Synthetic procedures.

**Synthesis of [K{U(OSi(O<sup>t</sup>Bu)<sub>3</sub>)<sub>3</sub>( $\mu$ -N)}<sub>2</sub>], **2**.** In a nitrogen-filled glovebox, a solution of [K<sub>2</sub>{U(OSi(O<sup>t</sup>Bu)<sub>3</sub>)<sub>3</sub>( $\mu$ -N)}<sub>2</sub>], **1** (65.7 mg, 0.03 mmol, 1 equiv) in 3 mL of toluene was poured onto solid AgBPh<sub>4</sub> (26.0 mg, 0.06 mmol, 2 equiv). The solution was stirred overnight at room temperature. Thereafter, the reaction mixture changed colour from dark brown to orange-brown and a dark precipitate formed. The reaction mixture was centrifuged to remove solid Ag<sup>0</sup> and KBPh<sub>4</sub>. The supernatant was then evaporated (1 mL) and left standing at -40°C overnight affording brown-orange crystals of [K{U(OSi(O<sup>t</sup>Bu)<sub>3</sub>)<sub>3</sub>( $\mu$ -N)}<sub>2</sub>], **2** (39.5 mg, yield=62%). <sup>1</sup>H NMR (400 MHz, *d*<sub>8</sub>-toluene, 298 K):  $\delta$  0.6 ppm (br s, -OSi(O<sup>t</sup>Bu)<sub>3</sub>, 162H). Anal. Calcd for CHN<sub>2</sub>O<sub>24</sub>Si<sub>6</sub>U<sub>2</sub>: C, 40.72; H, 7.69; N, 1.32. Found: C, 40.33; H, 7.21; N, 1.33.

When the reaction was performed with 1 equiv of AgBPh<sub>4</sub>, the slower consumption of the starting material (5 days) was observed but resulted in the formation of the same final reaction mixture as evidenced by <sup>1</sup>H NMR spectroscopy (Figure S1).

**Synthesis of  $[K_2\{U(OSi(O^tBu)_3)_3\}_2(\mu-N)_2(\mu-I)]$ , **3**.** In an argon-filled glovebox, solid  $I_2$  (1.3 mg, 0.005 mmol, 0.5 equiv) was added to a solution of  $[K_2\{U(OSi(O^tBu)_3)_3(\mu-N)\}_2]$ , **1** (21.9 mg, 0.01 mmol, 1 equiv) in 0.5 mL of  $d_8$ -toluene. The reaction mixture immediately changed colour from dark brown to orange. The  $^1H$  NMR spectrum of the reaction mixture (Figure S4) revealed the immediate consumption of the starting material. The reaction mixture was filtered on a 0.2  $\mu m$  porosity filter frit and the filtrate was left standing at  $-30^\circ C$  overnight affording ochre yellow crystals of  $[K_2\{U(OSi(O^tBu)_3)_3\}_2(\mu-N)_2(\mu-I)]$ , **3** (13.8 mg, yield=60%).  $^1H$  NMR (400 MHz,  $d_8$ -toluene, 298 K):  $\delta$  0.7 ppm (br s,  $-OSi(O^tBu)_3$ , 162H). Anal. Calcd for  $CHN_2O_{24}Si_6U_2(C_7H_8)_{0.7}$ : C, 39.23; H, 7.18; N, 1.19. Found: C, 39.16; H, 7.55; N, 1.13.

**Reaction of complex  $[K_2\{U(OSi(O^tBu)_3)_3(\mu-N)\}_2]$ , **1** with 10 equiv of  $AgBPh_4$ .** In a nitrogen-filled glovebox, a solution of  $[K_2\{U(OSi(O^tBu)_3)_3(\mu-N)\}_2]$ , **1** (17.6 mg, 0.008 mmol, 1 equiv) in 0.5 mL of  $d_8$ -toluene was added to solid  $AgBPh_4$  (34.8 mg, 0.08 mmol, 10 equiv). The reaction mixture was analyzed by  $^1H$  NMR spectroscopy and the only observable species was  $[U(OSi(O^tBu)_3)_4]$  (Figure S6).

**Reaction of complex  $[K_2\{U(OSi(O^tBu)_3)_3(\mu-N)\}_2]$ , **1** with 2 equiv of  $I_2$ .** In an argon-filled glovebox, solid  $I_2$  (1.8 mg, 0.0072 mmol, 2 equiv) was added to a solution of  $[K_2\{U(OSi(O^tBu)_3)_3(\mu-N)\}_2]$ , **1** (7.8 mg, 0.0036 mmol, 1 equiv) in 0.5 mL of  $d_8$ -toluene. The reaction mixture changed colour from dark brown to red and a colourless precipitate of presumably KI was formed. The reaction mixture was analyzed by  $^1H$  NMR spectroscopy after one night, revealing the formation of an intractable reaction mixture (Figure S7).

**Synthesis of  $[\{U(OSi(O^tBu)_3)_3\}_2(\mu-N)_2(\mu-thf)]$ , **4**.** In a nitrogen-filled glovebox, a blue suspension of  $[N(C_6H_4Br)_3][SbCl_6]$  (45.3 mg, 0.0056 mmol, 2 equiv) in 0.5 mL of thf was added to a dark brown solution of  $[K_2\{U(OSi(O^tBu)_3)_3(\mu-N)\}_2]$ , **1** (60 mg, 0.028 mmol, 1 equiv) in 0.5 mL of thf. Over the course of few minutes, the blue ammonium salt was fully consumed and the colour of the reaction mixture changed from dark brown to red-orange. The reaction mixture was divided into two portions of 0.5 mL. The solvent was removed from each fraction independently while keeping them at  $-80^\circ\text{C}$ . The resultant red-orange solid residues were both dissolved in a total of 0.4 mL of toluene. The resulting suspension was filtered on a 0.2  $\mu\text{m}$  porosity filter frit and the filtrate was left standing at  $-40^\circ\text{C}$  overnight yielding red-orange crystals of complex  $[\{U(OSi(O^tBu)_3)_3\}_2(\mu-N)_2(\mu-thf)]$ , **4** (21.1mg, yield=35%).  $^1\text{H}$  NMR (400 MHz,  $d_8$ -thf, 298K):  $\delta$  1.44 ppm (s,  $-OSi(O^tBu)_3$ , 162H).  $^1\text{H}$  NMR (400 MHz,  $d_8$ -toluene, 298K):  $\delta$  1.69 ppm (s,  $-OSi(O^tBu)_3$ , 162H). Anal. Calcd for  $C_{72}H_{162}O_{24}N_2Si_6U_2$ : C, 41.63; H, 7.44; N, 1.19. Found: C, 41.48; H, 7.83; N, 1.34. Quantitative  $^1\text{H}$  NMR spectroscopy by comparison with a  $O(SiMe_3)_2$  internal standard revealed 94% conversion of **1** into **4**, but the high solubility of **4** together with the used synthetic method prevents the obtention of larger isolated yields. Solvent removal at  $-80^\circ\text{C}$  is necessary due to the decomposition of complex **4** under vacuum at room temperature. When the solvent removal from the reaction mixture is performed at room temperature a mixture of light green-blue and red solids is formed. If the solid is maintained under dynamic vacuum for additional 15 minutes, only light green-blue solids can be observed. The  $^1\text{H}$  NMR spectrum of the green residue does not show the presence of complex **4** but a mixture of unidentified species (Figure S11). When the reaction mixture is dried at  $-80^\circ\text{C}$  over the course of 8h only the signals of complex **4** are observed (Figure S12). If more than 0.5 mL of the reaction

mixture are dried at -80°C, the longer times needed for the evaporation of the solvent leads to the formation of decomposition products (Figure S13).

**Stability of complex 4 in the reaction mixture under argon.** Complex 4 was formed *in situ* as described above. The evolution of the reaction mixture was monitored for 5 days by  $^1\text{H}$  NMR spectroscopy at room temperature. The colour of the reaction mixture changed slowly over time to light green and complex 4 was fully consumed after 5 days yielding a complex mixture of species (Figures S14). Removal of volatiles from the reaction mixture and subsequent dissolution of the green-blue residue in toluene (0.5 mL) afforded a suspension that was filtered on a 0.2  $\mu\text{m}$  filter frit. The resulting solution left standing at -40°C overnight yielded light blue crystals of the complex  $[\text{U}(\text{OSi}(\text{O}^t\text{Bu})_3)_3\text{Cl}(\text{thf})_2]$ , 5.

**Stability of isolated complex 4 under Ar.** In an argon-filled glovebox, complex 4 (9.1 mg, 0.0042 mmol) was dissolved in 0.5 mL of  $d_8$ -thf. The evolution of the composition of the solution was monitored by  $^1\text{H}$  NMR spectroscopy, revealing the full consumption of complex 4 after 5 days and the formation of an intractable mixture of products (Figure S16). After full decomposition of complex 4, the headspace of the reaction mixture was analyzed in a GC-MS spectrometer, revealing the formation of  $\text{N}_2$  (Figure S45). Thereafter, volatiles were removed under vacuum and an excess (200  $\mu\text{L}$ ) of a 2M solution of HCl in  $\text{Et}_2\text{O}$  was added to the yellow solid residue. The reagents were left reacting for 15 minutes and volatiles were removed under vacuum affording a colourless precipitate.  $d_6$ -dmsO was added to the solid residue. A known amount of dimethylsulfone was added as an internal standard.  $^1\text{H}$  NMR studies revealed the formation of only trace amounts (1.5%) of  $\text{NH}_4\text{Cl}$  (Figure S18).

**Stability of isolated complex 4 under vacuum.** In an argon-filled glovebox, complex **4** (8.3mg, 0.0038 mmol) was dissolved in 0.5 mL of  $d_8$ -thf. Upon exposure of the solution to dynamic vacuum, light brown solids start to form while the red solution evaporates. Upon complete removal of the solvent light brown-yellow solids form. The solid residue was exposed to dynamic vacuum for additional 15 minutes and then it was dissolved in  $d_8$ -thf yielding a yellow-light brown solution. Analysis of the reaction mixture by  $^1\text{H}$  NMR spectroscopy revealed the full consumption of complex **4** and the formation of an intractable mixture of products (Figure S19) identical to that formed upon decomposition of isolated complex **4** under Ar.

**Reaction of complex 2 with CO.** In a nitrogen-filled glovebox, complex  $[\text{K}\{\text{U}(\text{OSi}(\text{O}^t\text{Bu})_3)_3(\mu\text{-N})\}_2]$ , **2** (10.4 mg, 0.0049 mmol, 1 equiv) was dissolved in 0.5 mL of  $d_8$ -toluene and the solution was transferred into an NMR tube equipped with a J-Young valve. The NMR tube was connected to a Schlenck line and the solution was degassed by three cycles of freeze-pump-thawing. 1 atm of  $^{13}\text{CO}$  was added to the tube. The reaction mixture changed colour from brown-orange to light green over the course of 30 minutes.  $^1\text{H}$  NMR studies showed the formation of an intractable mixture of compounds (Figure S20). The  $^{13}\text{C}$  NMR spectrum of the reaction mixture showed the presence of two peaks at 215.71 and at -162.60 ppm attributed to U-bound  $^{13}\text{C}$ -containing species (Figure S21). Volatiles were removed and 0.5 mL of pD=12  $\text{D}_2\text{O}$  were added to the resultant light green solid together with few drops of  $d_6$ -dmsO as a reference. The  $^{13}\text{C}$  NMR spectrum of the reaction mixture in  $\text{D}_2\text{O}$  showed the presence of  $\text{N}^{13}\text{CO}^-$  (Figure S22). Quantitative  $^{13}\text{C}$  NMR spectroscopy, performed with  $\text{CH}_3^{13}\text{COONa}$  as external standard, revealed the presence of 2 equiv of

$\text{N}^{13}\text{CO}^-$  per complex. These results indicate that both nitrides undergo reductive carbonylation according to Scheme S1.

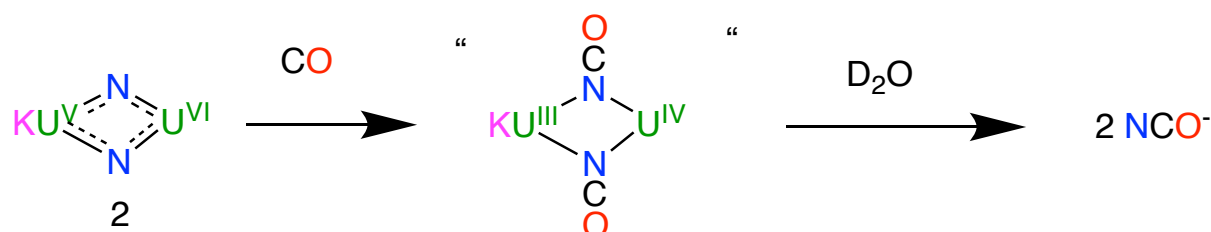

**Scheme S1.** Reaction of complex **2** with CO

**Reactivity of complex 4 with CO and H<sub>2</sub>.** Upon addition of 1 atm of CO to a degassed thf or toluene solution of **4**, the <sup>1</sup>H NMR spectrum (Figures S23-S24) showed no reaction between complex **4** and CO, but only the formation of decomposition products over the course of 5 days. Volatiles were removed and 0.5 mL of pD=12 D<sub>2</sub>O were added to the resultant light green solid together with few drops of *d*<sub>6</sub>-dmso as a reference. The <sup>13</sup>C NMR spectrum of the reaction mixture quenched in D<sub>2</sub>O did not show the presence of <sup>13</sup>C-containing species. Similarly, after addition of 1 atm H<sub>2</sub> to a solution of to a degassed thf or toluene solution of **4** no reaction was observed.

**Reaction of complex 2 with H<sub>2</sub> and isolation of the complexes [K<sub>2</sub>{U(OSi(O<sup>t</sup>Bu)<sub>3</sub>)<sub>3</sub>(μ-NH)}<sub>2</sub>], **6** and [{U(OSi(O<sup>t</sup>Bu)<sub>3</sub>)<sub>3</sub>}<sub>2</sub>(μ-NH<sub>2</sub>)<sub>2</sub>(μ-thf)], **7**.** In a nitrogen-filled glovebox, complex [K{U(OSi(O<sup>t</sup>Bu)<sub>3</sub>)<sub>3</sub>(μ-N)}<sub>2</sub>], **2** (13.3 mg, 0.006 mmol, 1 equiv) was dissolved in 0.5 mL of *d*<sub>8</sub>-toluene and the solution was transferred into an NMR tube equipped with a J-Young valve. The NMR tube was connected to a Schlenck line and the solution was degassed by three cycles of freeze-pump-thawing. 1 atm of H<sub>2</sub> was added to the tube. The reaction mixture

slowly changed colour from brown-orange to green over the course of 2 days.  $^1\text{H}$  NMR studies revealed the slow conversion of complex **2** to an equimolar mixture of two species (Figure S25). No intermediate species could be observed. Volatiles were removed and the resulting residue was dissolved in 0.3 mL of  $\text{Et}_2\text{O}$ . One drop of thf was added to the reaction mixture and the solution was left standing at  $-40^\circ\text{C}$  affording yellow crystals of the previously reported complex  $[\text{K}_2\{\text{U}(\text{OSi}(\text{O}^t\text{Bu})_3)_3(\mu\text{-NH})_2\}]$ , **6**<sup>1</sup> and light green crystals of complex  $[\{\text{U}(\text{OSi}(\text{O}^t\text{Bu})_3)_3\}_2(\mu\text{-NH}_2)_2(\mu\text{-thf})]$ , **7** that were characterized by XRD studies. The D-labelled mixture of **6** and **7** was prepared using the same procedure from  $\text{D}_2$ .

The formation of complexes **6** and **7** is believed to proceed according to Scheme S2.

Due to the similar solubility the two complexes, complex **7** cannot be obtained analytically pure from this reaction.

In an experiment carried out with the same procedure, after the reaction was finished, the volatiles were removed and 300  $\mu\text{L}$  of a 2M solution of HCl in  $\text{Et}_2\text{O}$  were added to the solid residue. After 10 minutes, volatiles were removed under vacuum. The resultant solid was dissolved in 0.5 mL of  $d_6$ -dmsO and dimethylsulfone was added as an internal standard for the quantitative  $\text{NH}_4\text{Cl}$  detection.  $\text{NH}_4\text{Cl}$  is formed in 72% yield. (Figure S29)

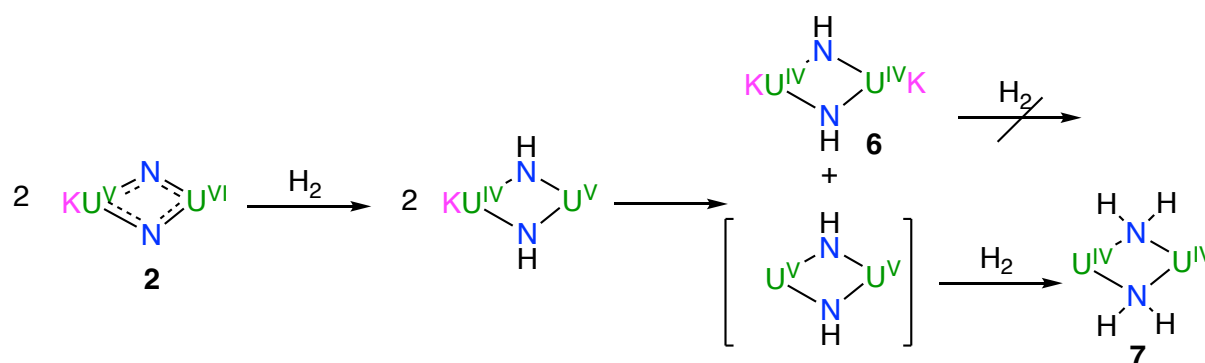

**Scheme S2.** Proposed mechanism for the formation of the complexes **6** and **7** upon hydrogenation of complex **2**.

**Independent synthesis of  $[\{U(OSi(O^tBu)_3)_3\}_2(\mu-NH_2)_2]$ , **7**.** In a nitrogen-filled glovebox, a solution of  $NEt_3HBPPh_4$  (10.2 mg, 0.024 mmol, 2 equiv) in 0.5 mL of thf was added to a solution of complex  $[K_2\{U(OSi(O^tBu)_3)_3(\mu-NH)\}_2]$ , **6** (25.9 mg, 0.012 mmol, 1 equiv) in 0.5 mL of thf. The reaction mixture immediately changed colour from yellow to green and colourless precipitate of  $KBPh_4$  formed.  $^1H$  NMR studies revealed the clean formation of a new species (Figure S30). Volatiles were removed and 0.5 mL of toluene were added to the resultant green solid residue. The reaction mixture was filtered and the resultant green solution was left standing at  $-40^\circ C$  affording light green crystals of  $[\{U(OSi(O^tBu)_3)_3\}_2(\mu-NH_2)_2]$ , **7** (15.8 mg, yield= 62.4%)  $^1H$  NMR (400 MHz,  $d_8$ -thf, 298 K):  $\delta$  -0.21 (s,  $-OSi(O^tBu)_3$ , 162H) ppm,  $^1H$  NMR (400 MHz,  $d_8$ -toluene, 298 K):  $\delta$  -0.21 (s,  $-OSi(O^tBu)_3$ , 162H) ppm. Anal. Calcd for  $C_{72}H_{166}N_2O_{24}Si_6U_2(C_7H_8)_{0.7}$ : C, 42.90%; H, 8.03% ; N, 1.30%. Found: C, 42.88%; H, 8.37%; N, 1.66%. Crystals of  $[\{U(OSi(O^tBu)_3)_3\}_2(\mu-NH_2)_2(\mu-thf)]$ , **7** suitable for XRD studies were obtained by cooling down a concentrated solution of **7** in  $Et_2O$  at  $-40^\circ C$ .

Attempts to oxidize complex **6** using “magic blue” resulted in a mixture of multiple products including a chloride abstraction product (the mixed valent U(V)U(VI) diimido chloride  $[\{U(OSi(O^tBu)_3)_3\}_2(\mu-NH)_2(\mu-Cl)]$  was crystallized and its crystal structure determined (CCDC 2080129)).

**Reaction of **2** with excess HCl.** 200  $\mu L$  of a 2M solution of HCl in  $Et_2O$  were added to **2** (11.3 mg, 0.0053 mmol, 1 equiv). The solution immediately turned light yellow. After 10 minutes, volatiles were removed under vacuum. The resultant solid was dissolved in 0.5 mL of  $d_6$ -dmsO and dimethylsulfone was added as an internal standard for the quantitative  $NH_4Cl$  detection.  $NH_4Cl$  is formed in 93% yield.

**Reaction of 4 with excess HCl.** 300  $\mu$ L of a 2M solution of HCl in Et<sub>2</sub>O were added to **4** (6.2 mg, 0.0029 mmol, 1 equiv). The solution immediately turned light green. After 10 minutes, volatiles were removed under vacuum. The resultant solid was dissolved in 0.5 mL of *d*<sub>6</sub>-dmsO and dimethylsulfone was added as an internal standard for the quantitative NH<sub>4</sub>Cl detection. NH<sub>4</sub>Cl is formed in 100% yield.

## NMR Spectra

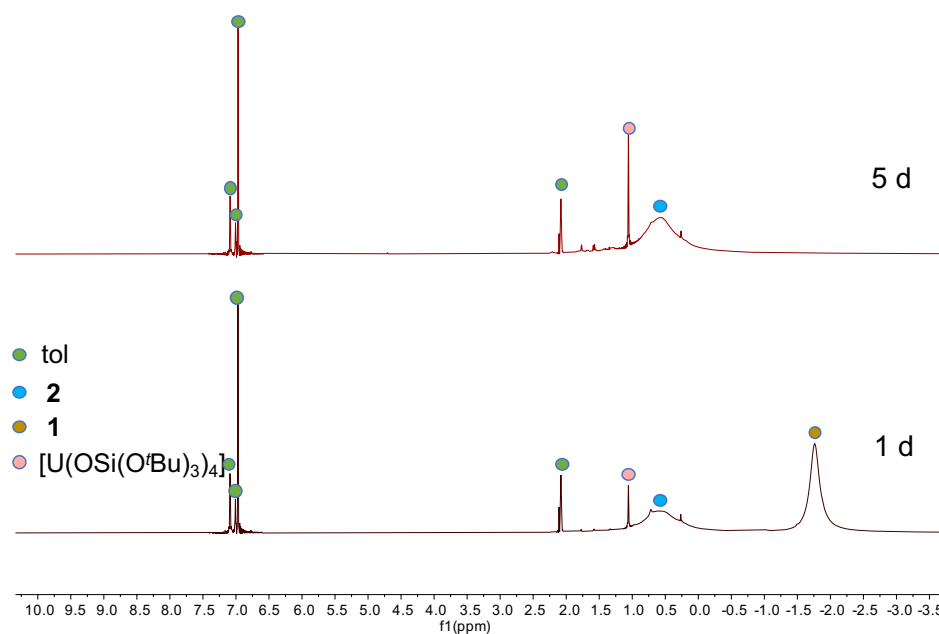

**Figure S1.** Evolution of the  $^1\text{H}$  NMR spectrum (400 MHz, 298K,  $d_8$ -toluene) of the reaction mixture obtained 1 day (bottom) and 5 days (top) after the addition of 1 equiv of  $\text{AgBPh}_4$  to **1**

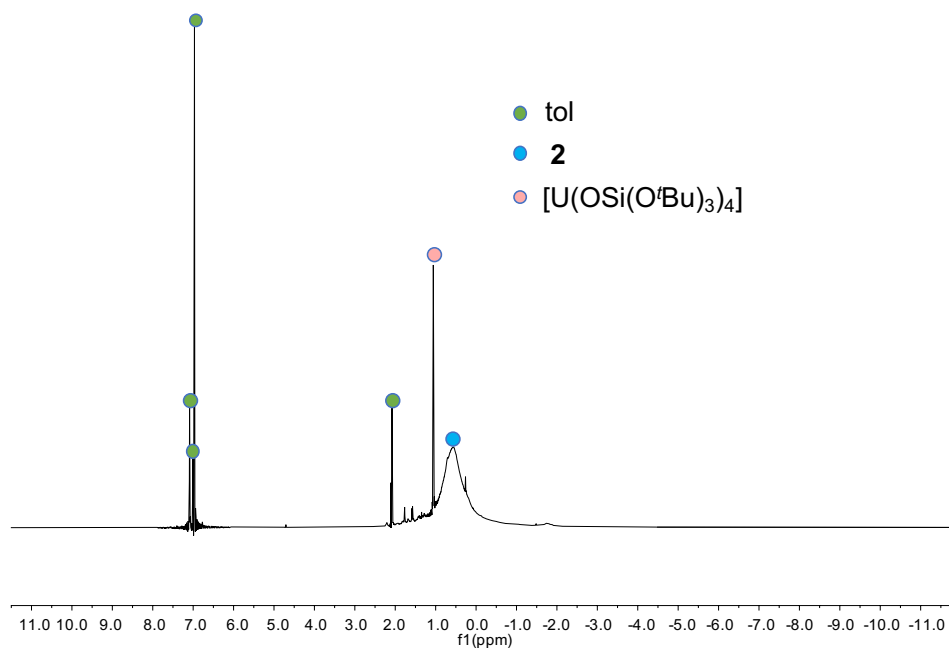

**Figure S2.**  $^1\text{H}$  NMR spectrum (400 MHz, 298K,  $d_8$ -toluene) of the reaction between **1** and **2** equiv of  $\text{AgBPh}_4$  overnight forming complex **2**

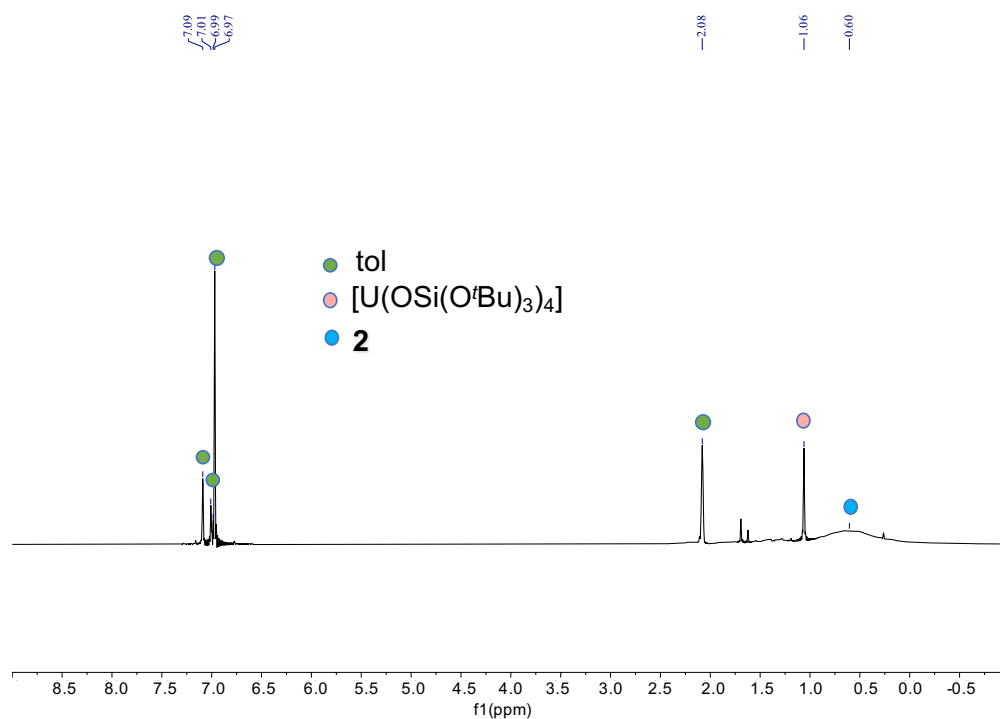

**Figure S3.**  $^1\text{H}$  NMR spectrum (400 MHz, 298K,  $d_8$ -toluene) of isolated complex **2**, isolated crystals may contain traces of the  $[\text{U}(\text{OSi}(\text{O}^t\text{Bu})_3)_4]$  in 3-7% ratio compared to **2**.

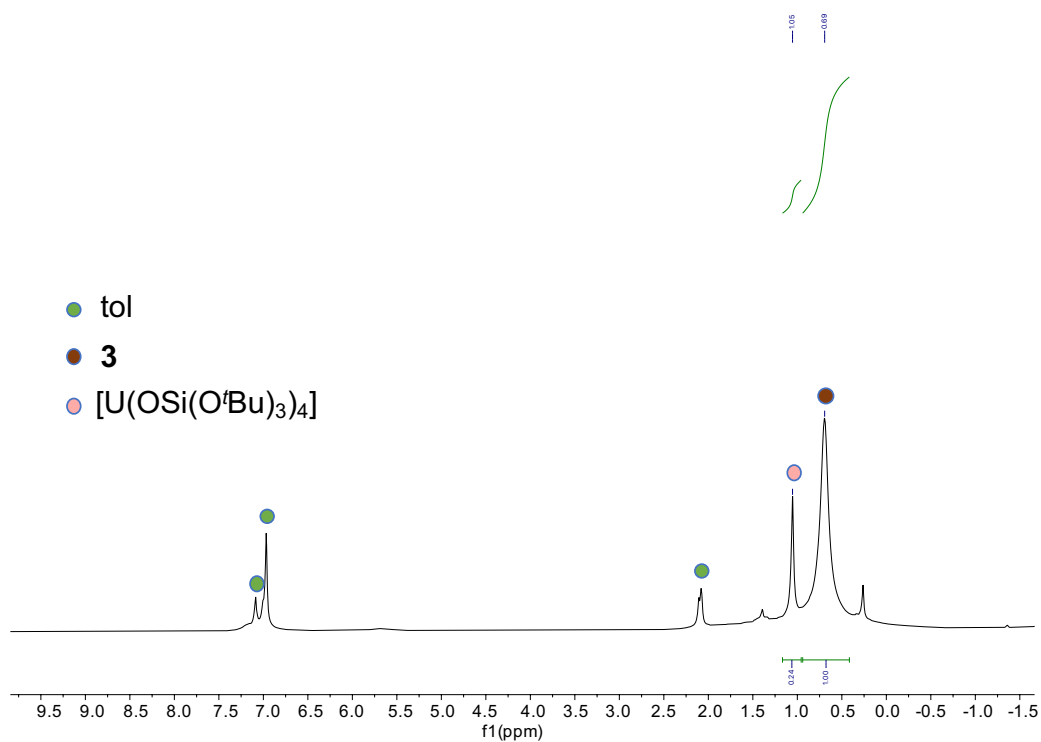

**Figure S4.**  $^1\text{H}$  NMR spectrum (400 MHz, 298K,  $d_8$ -toluene) immediately after addition of 0.5 equiv of  $\text{I}_2$  to **1** yielding complex **3**

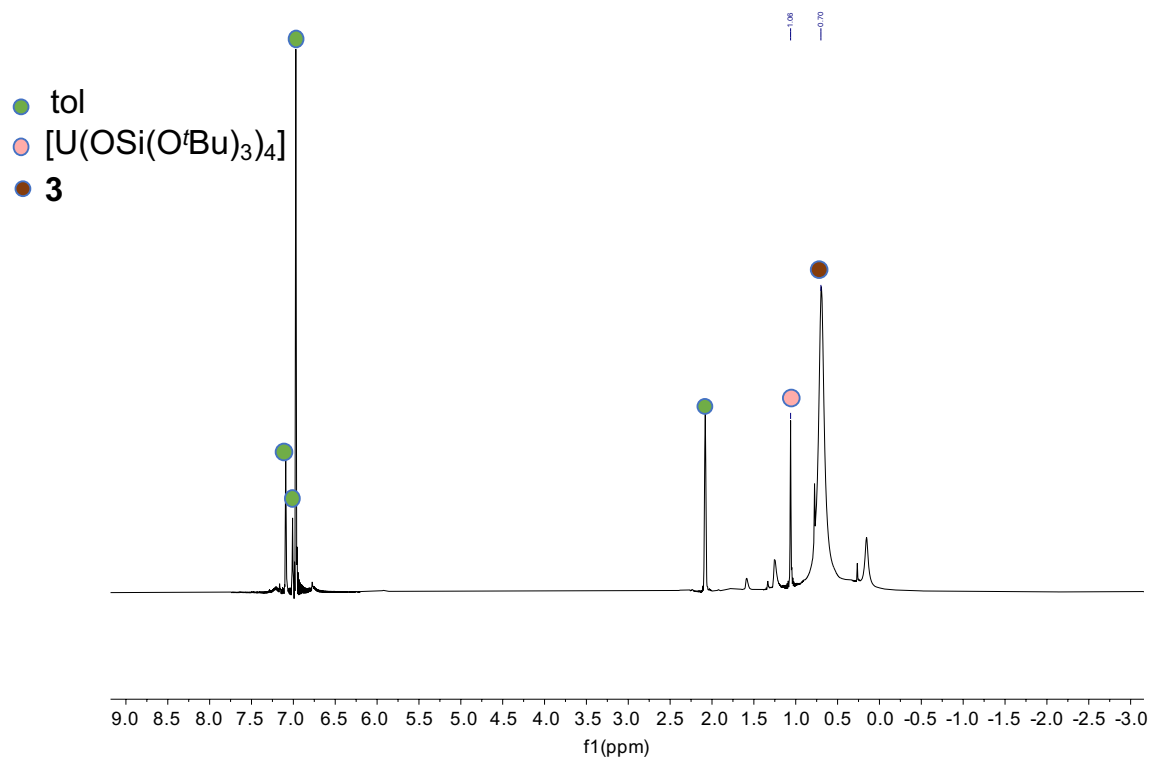

**Figure S5.** <sup>1</sup>H NMR spectrum (400 MHz, 298K, *d*<sub>8</sub>-toluene) of **3**, isolated crystals always contain traces of the [U(OSi(O<sup>t</sup>Bu)<sub>3</sub>)<sub>4</sub>] complex.

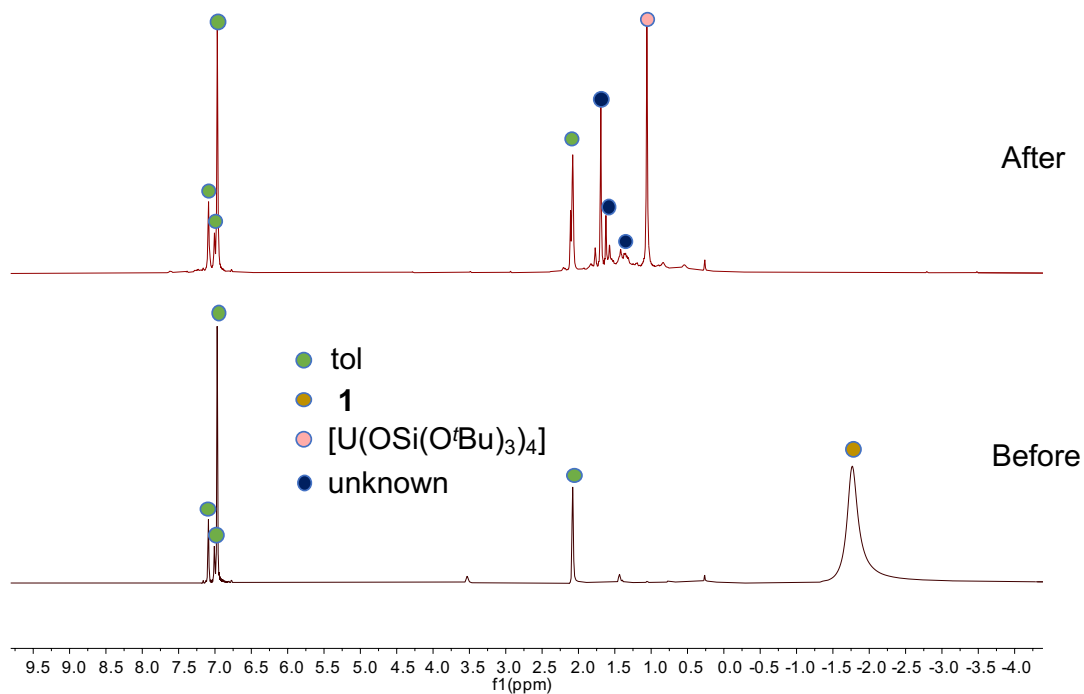

**Figure S6.** <sup>1</sup>H NMR spectra (400 MHz, 298K, *d*<sub>8</sub>-toluene) before and after addition of 10 equiv of AgBPh<sub>4</sub> to **1**

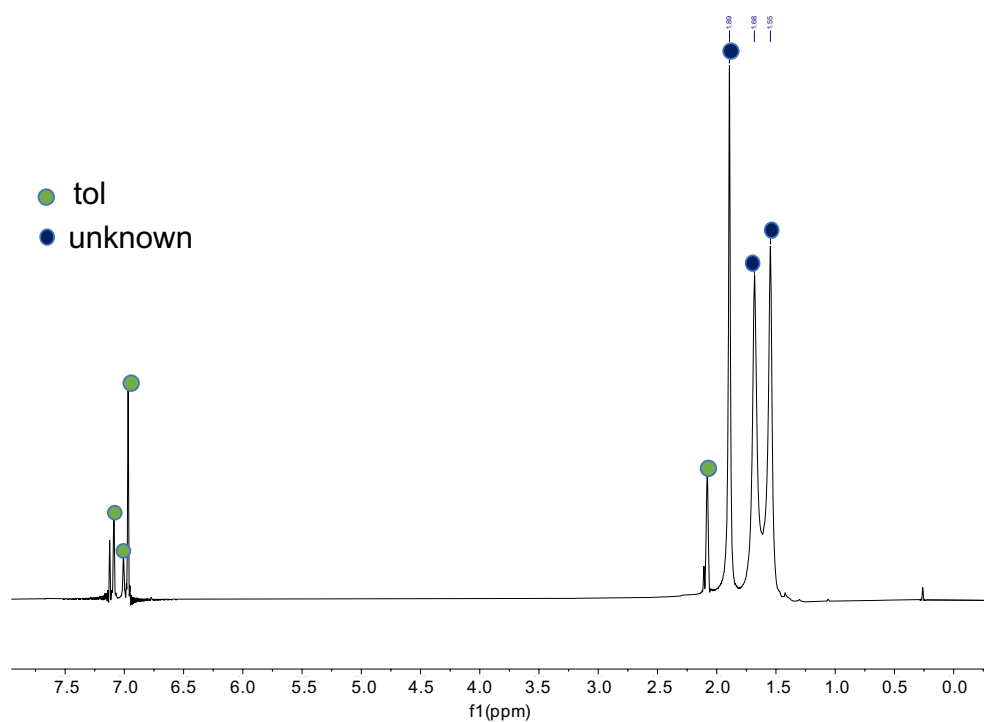

**Figure S7.**  $^1\text{H}$  NMR spectrum (400 MHz, 298K,  $d_8$ -toluene) of the reaction between **1** and 2 equiv of  $\text{I}_2$  after one night.

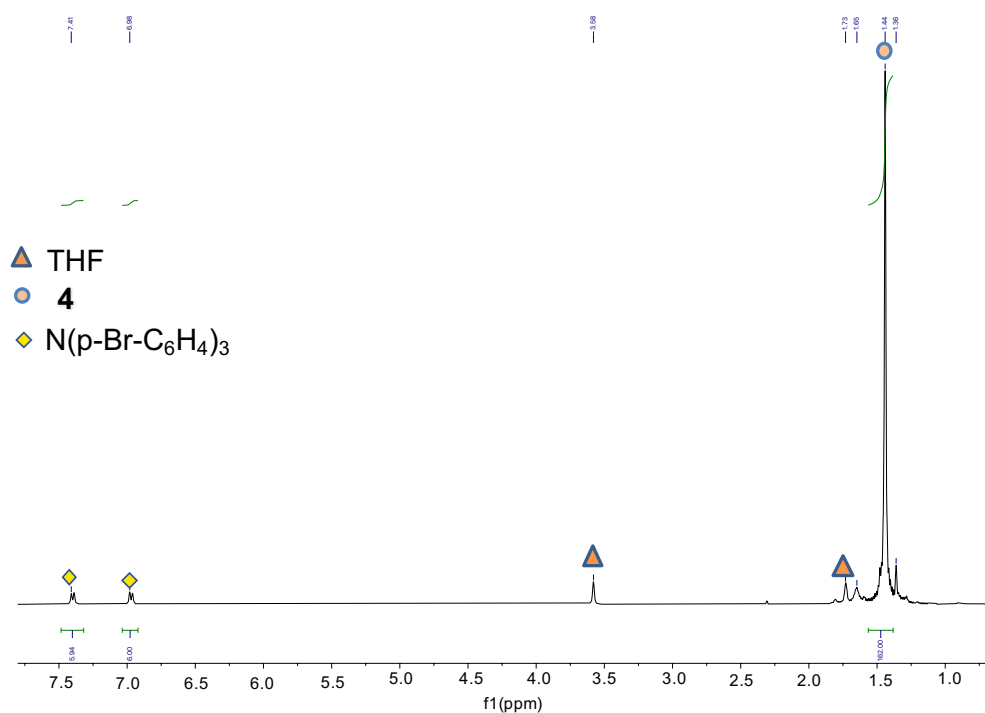

**Figure S8.**  $^1\text{H}$  NMR spectrum (400 MHz, 298K,  $d_8$ -thf) of the reaction between **1** and 2 equiv of  $[\text{N}(\text{C}_6\text{H}_4\text{Br})_3][\text{SbCl}_6]$  forming complex **4**.

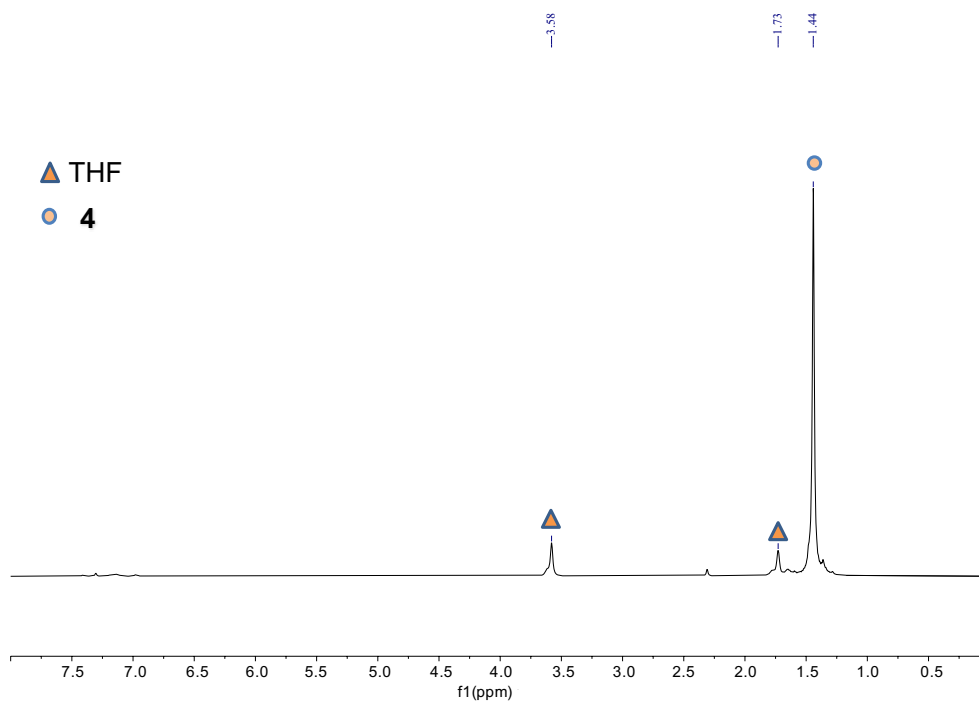

**Figure S9.**  $^1\text{H}$  NMR spectrum (400 MHz, 298K,  $d_8$ -thf) of isolated complex  $[\{\text{U}(\text{OSi}(\text{O}^t\text{Bu})_3)_2(\mu\text{-N})_2(\mu\text{-thf})\}]$ , **4**.

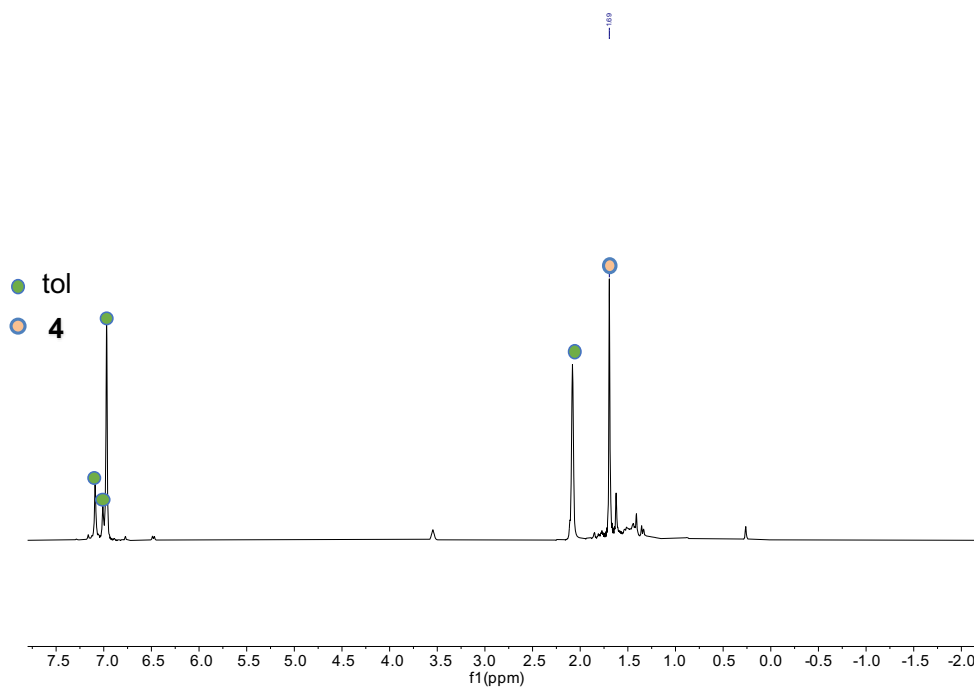

**Figure S10.**  $^1\text{H}$  NMR spectrum (400 MHz, 298K,  $d_8$ -toluene) of isolated complex  $[\{\text{U}(\text{OSi}(\text{O}^t\text{Bu})_3)_2(\mu\text{-N})_2(\mu\text{-thf})\}]$ , **4**.

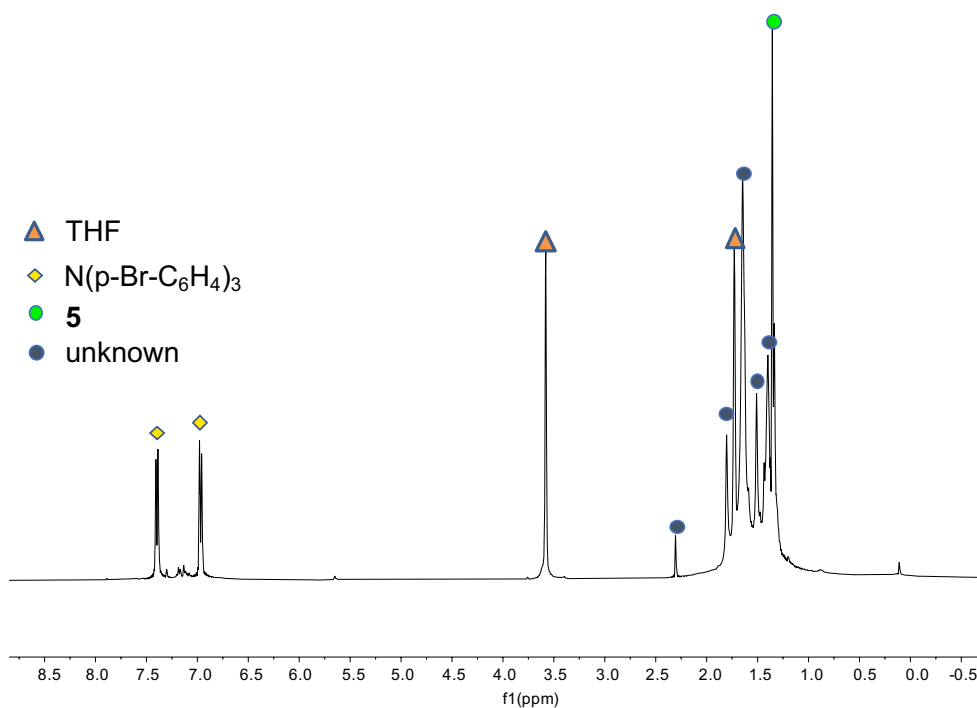

**Figure S11.**  $^1\text{H}$  NMR spectrum (400 MHz, 298K,  $d_8$ -thf) of the residue obtained after solvent removal under vacuum from the reaction mixture between **1** and 2 equiv of  $[\text{N}(\text{C}_6\text{H}_4\text{Br})_3][\text{SbCl}_6]$ .

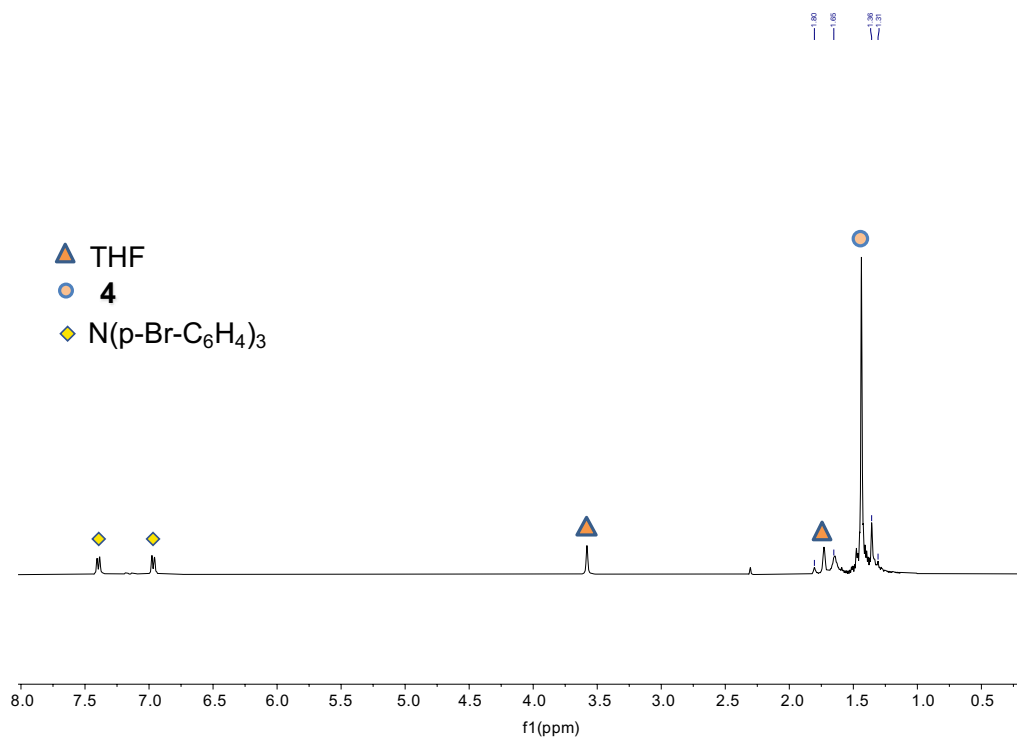

**Figure S12.**  $^1\text{H}$  NMR spectrum (400 MHz, 298K,  $d_8$ -thf) of the residue obtained after solvent removal under vacuum at  $-80^\circ\text{C}$  for 8h from the reaction mixture between **1** and 2 equiv of  $[\text{N}(\text{C}_6\text{H}_4\text{Br})_3][\text{SbCl}_6]$ .

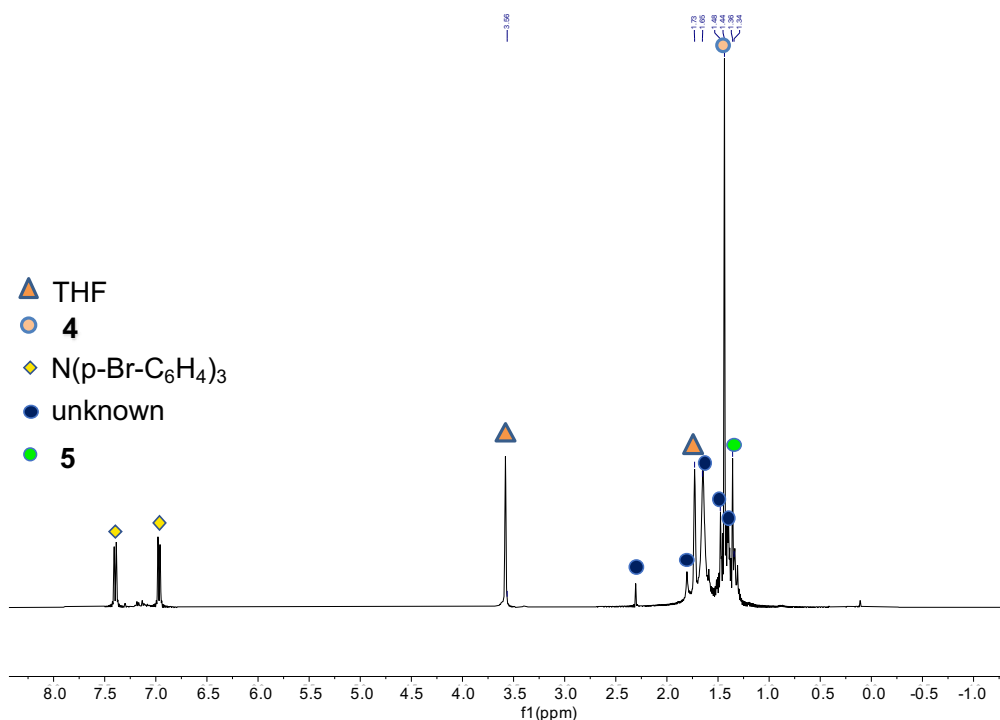

**Figure S13.**  $^1\text{H}$  NMR spectrum (400 MHz, 298K,  $d_8$ -thf) of the residue obtained after solvent removal under vacuum at  $-80^\circ\text{C}$  for 12h from the reaction mixture between **1** and 2 equiv of  $[\text{N}(\text{C}_6\text{H}_4\text{Br})_3][\text{SbCl}_6]$ .

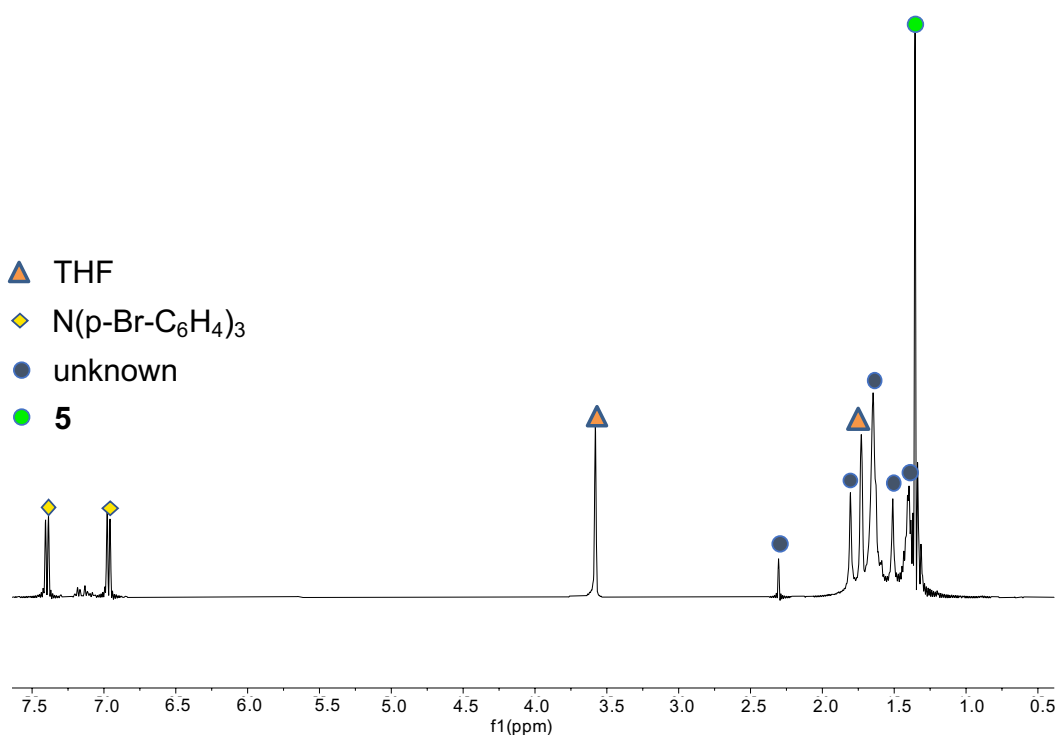

**Figure S14.**  $^1\text{H}$  NMR spectrum (400 MHz, 298K,  $d_8$ -thf) of the reaction mixture obtained after leaving reacting for 5 days at room temperature 2 equiv of  $[\text{N}(\text{C}_6\text{H}_4\text{Br})_3][\text{SbCl}_6]$  to **1**.

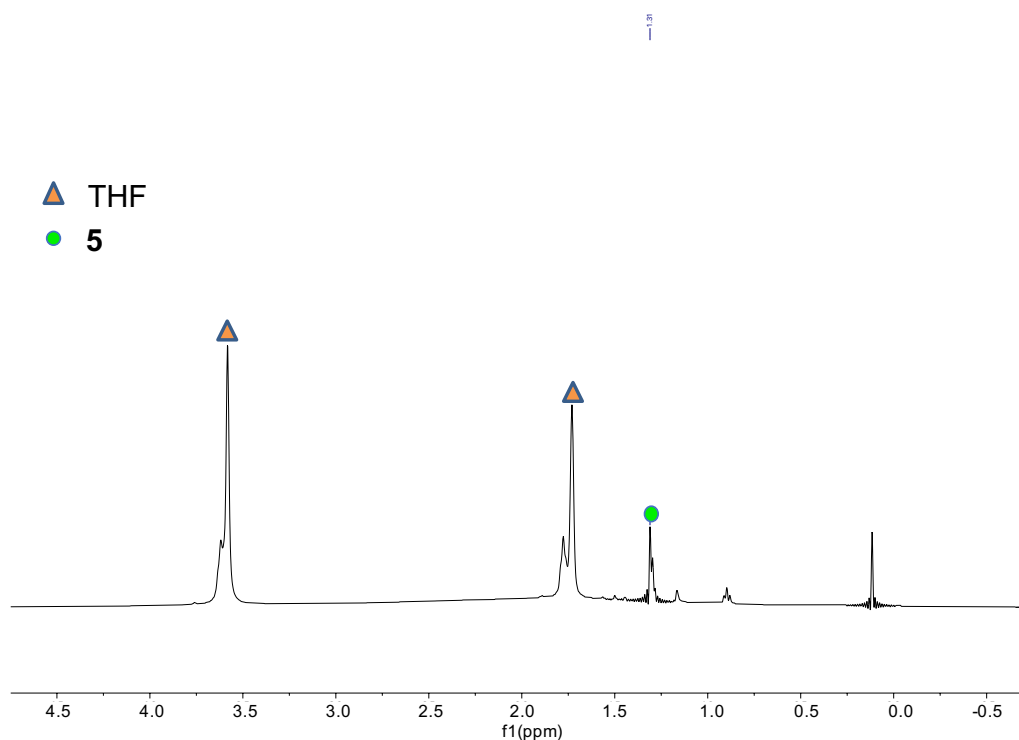

**Figure S15.**  $^1\text{H}$  NMR spectrum (400 MHz, 298K,  $d_8$ -thf) of isolated crystals of complex  $[\text{U}(\text{OSi}(\text{OtBu})_3)_3\text{Cl}(\text{thf})_2]$ , **5**

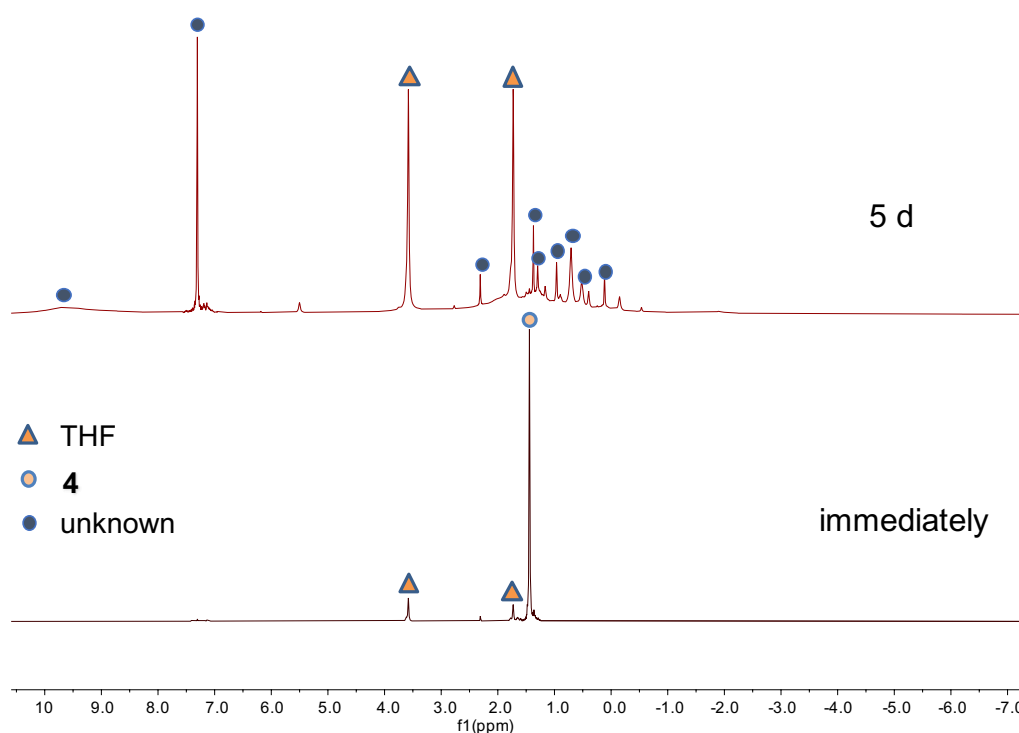

**Figure S16.** Evolution of the  $^1\text{H}$  NMR spectrum (400 MHz, 298K,  $d_8$ -thf) of isolated complex **4** under Ar showing complete disappearance of the signals of **4**.

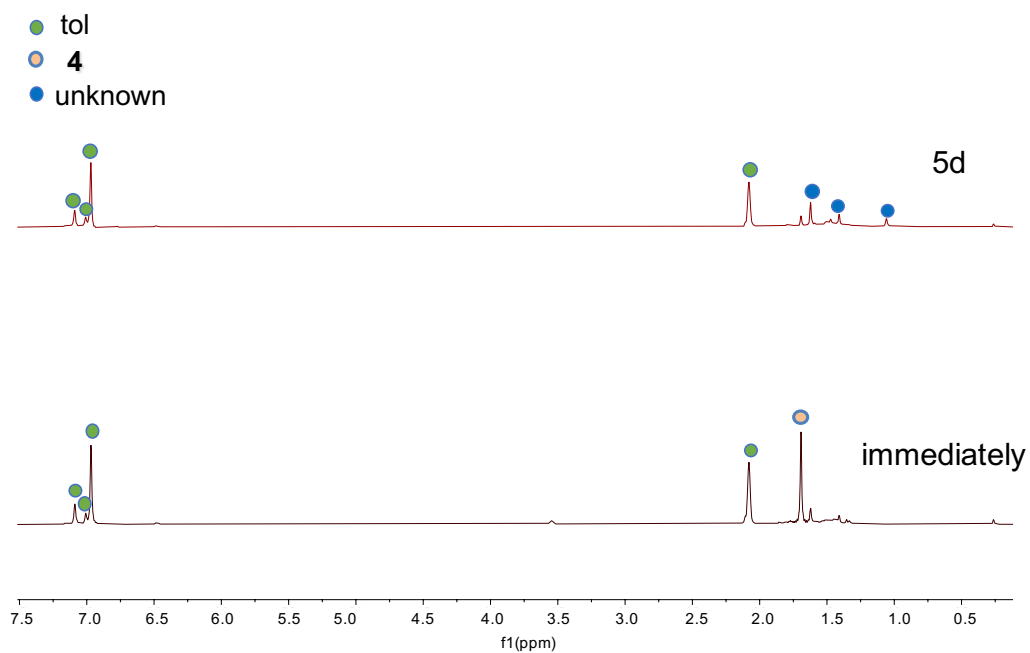

**Figure S17.** Evolution of the  $^1\text{H}$  NMR spectrum (400 MHz, 298K,  $d_8$ -toluene) of isolated complex **4** under argon showing complete disappearance of the signals of **4**.

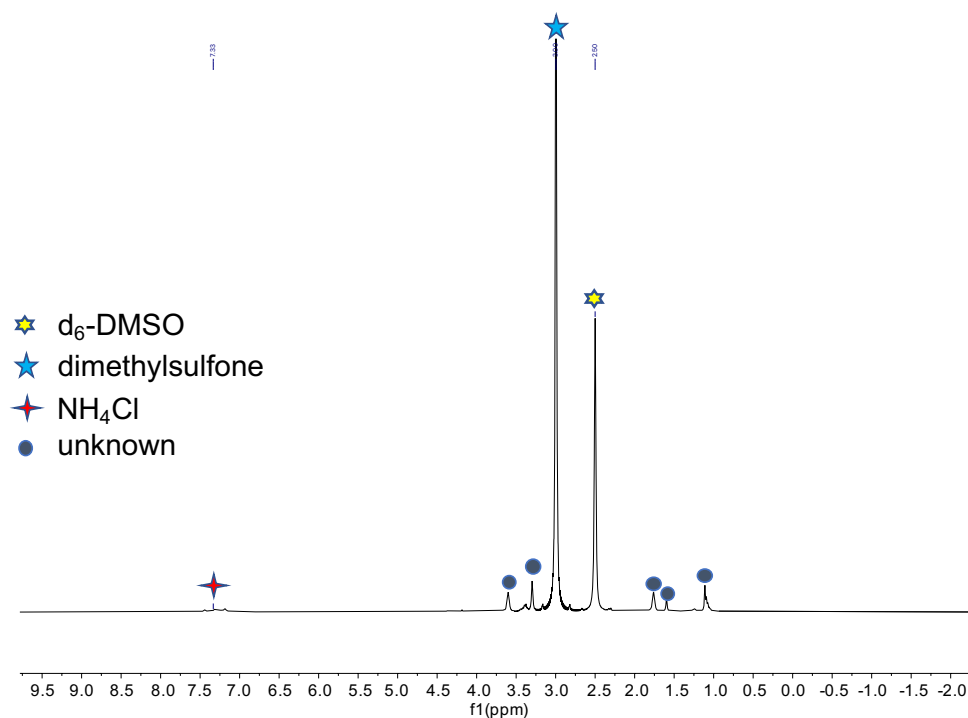

**Figure S18.**  $^1\text{H}$  NMR spectrum (400 MHz, 298K,  $d_6$ -dmsol) of the residue obtained after evaporation of the reaction mixture resulting from the decomposition under argon of isolated **4**, after addition of excess 2M HCl ( $\text{Et}_2\text{O}$ ). The spectrum shows only traces of  $\text{NH}_4\text{Cl}$ .

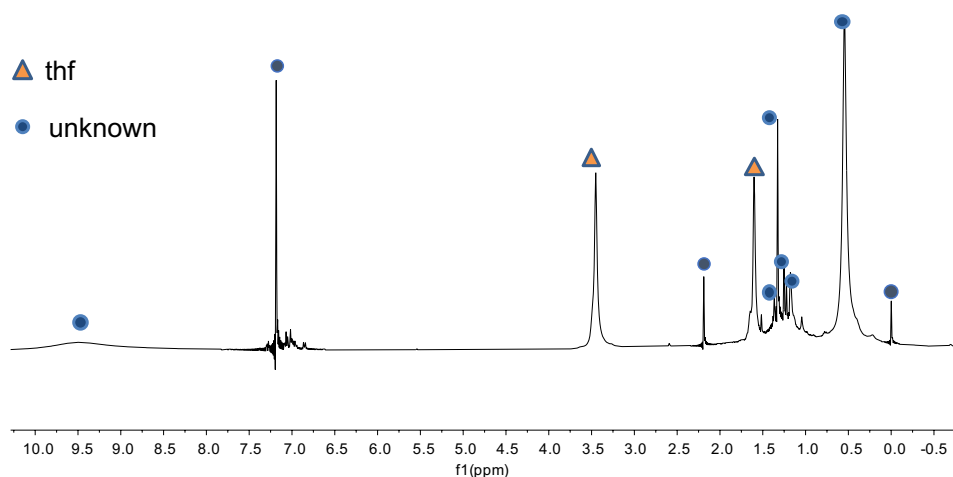

**Figure S19.**  $^1\text{H}$  NMR spectrum (400 MHz, 298K,  $d_8$ -thf) of isolated complex **4** after exposing the solid to dynamic vacuum for 15 minutes showing complete disappearance of the signals of **4**.

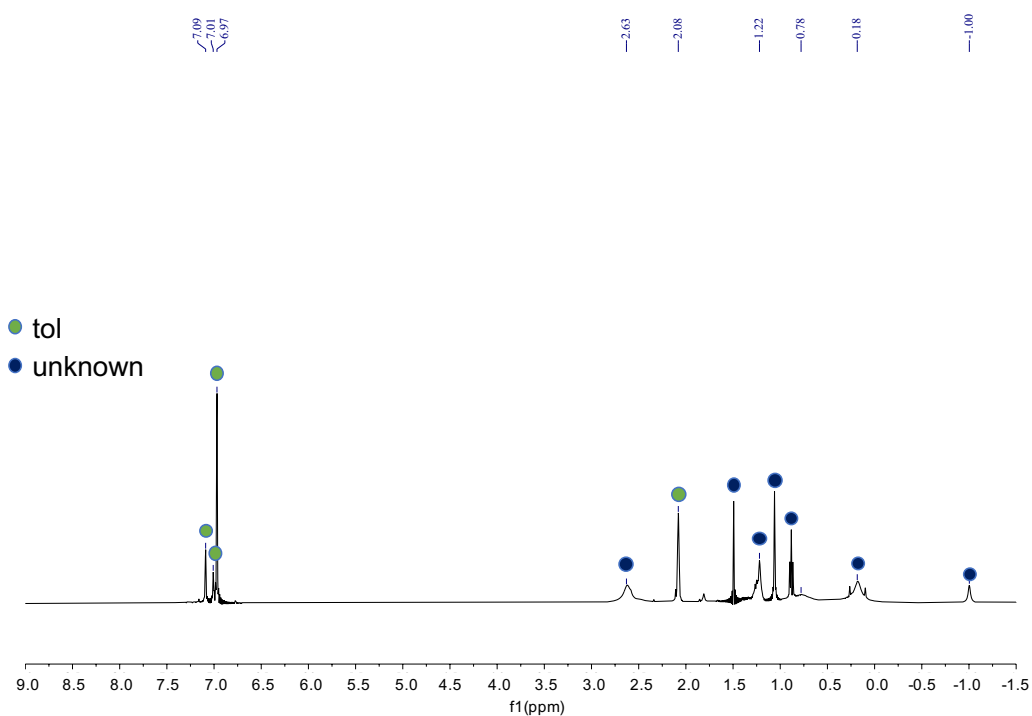

**Figure S20.**  $^1\text{H}$  NMR spectrum (400 MHz, 298K,  $d_8$ -toluene) of the reaction mixture between **2** and 1 atm of  $^{13}\text{CO}$ .

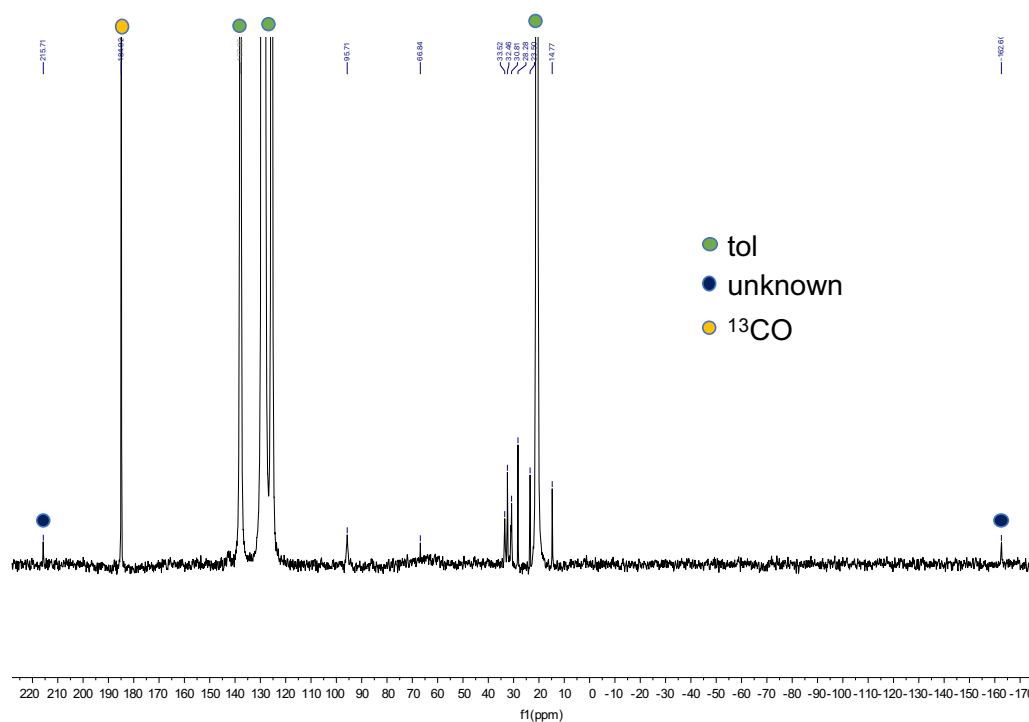

**Figure S21.**  $^{13}\text{C}$  NMR spectrum (151 MHz, 298K,  $d_8$ -toluene) of the reaction mixture between **2** and 1 atm of  $^{13}\text{CO}$ .

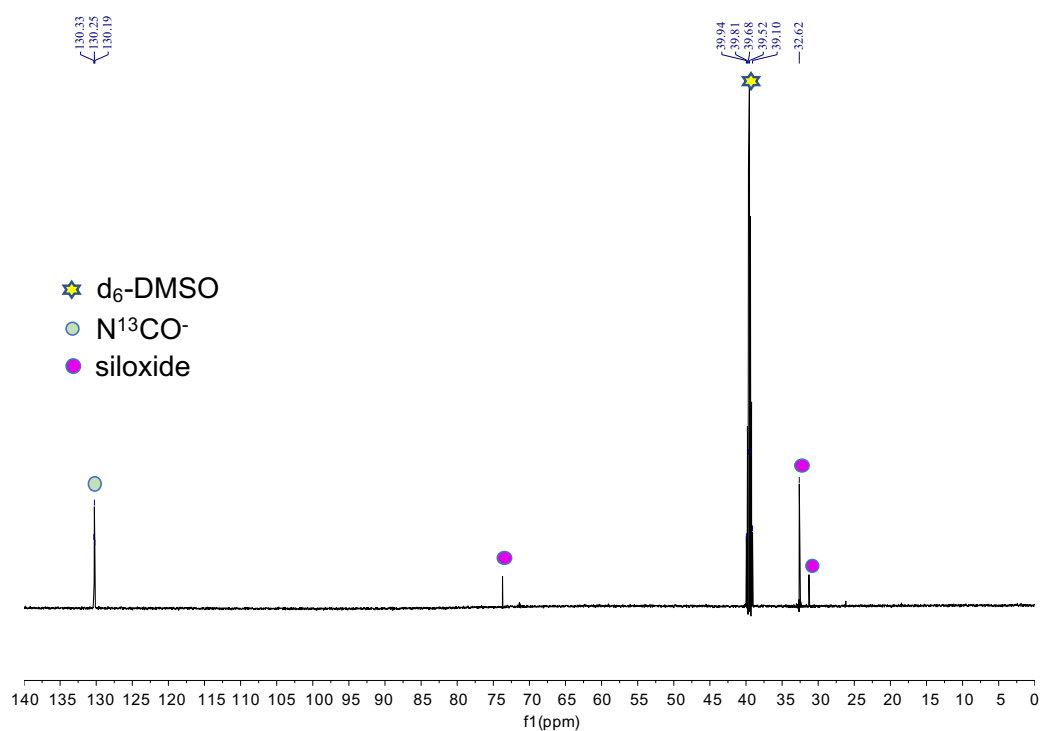

**Figure S22.**  $^{13}\text{C}$  NMR spectrum (151 MHz, 298K,  $\text{D}_2\text{O}$ ) of the hydrolysis of the reaction mixture of **2** with  $^{13}\text{CO}$  in  $d_8$ -toluene with a pD = 12  $\text{D}_2\text{O}$  solution.

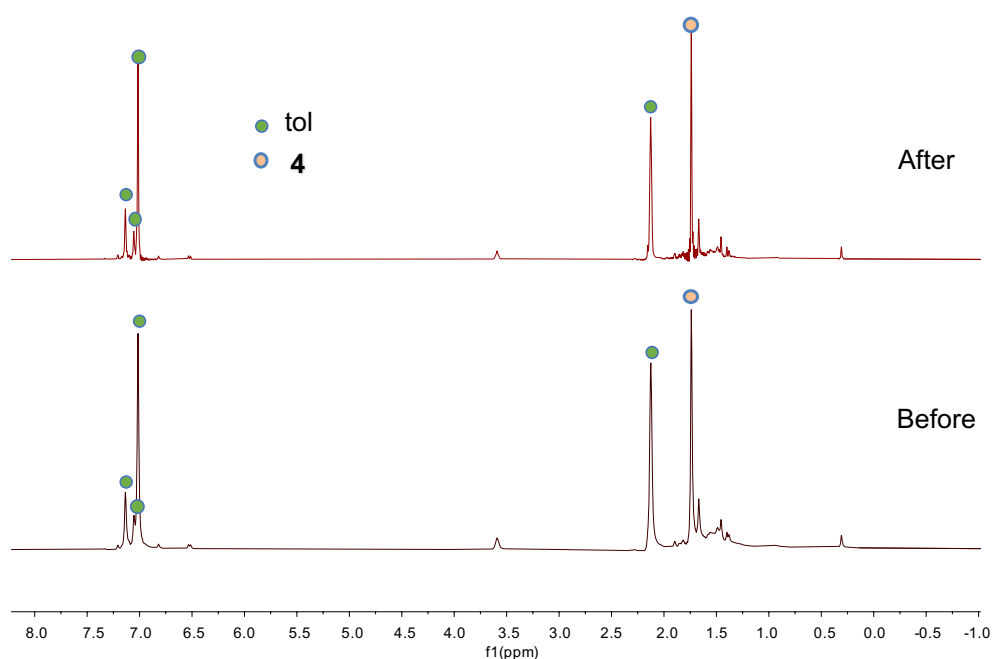

**Figure S23.**  $^1\text{H}$  NMR spectra (400 MHz, 298K,  $d_8$ -toluene) comparison between isolated complex **4** and the reaction mixture immediately after addition of  $^{13}\text{CO}$  to isolated complex **4** showing absence of reaction.

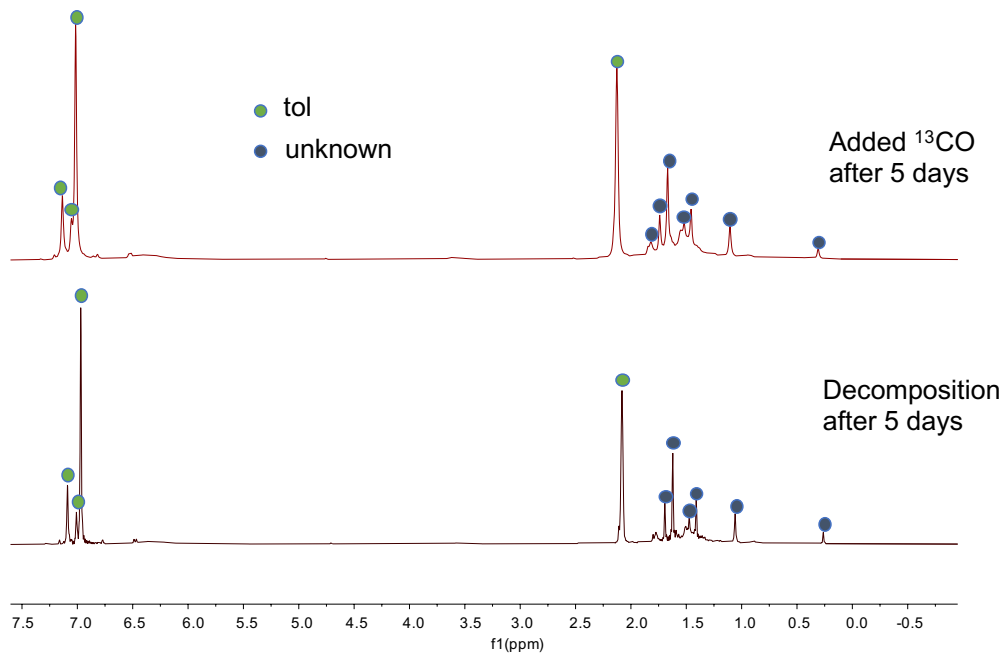

**Figure S24.**  $^1\text{H}$  NMR spectra (400 MHz, 298K,  $d_8$ -toluene) comparison between the decomposition of complex **4** under argon after 5 days and the reaction mixture 5 days after addition of  $^{13}\text{CO}$  to isolated complex **4**.

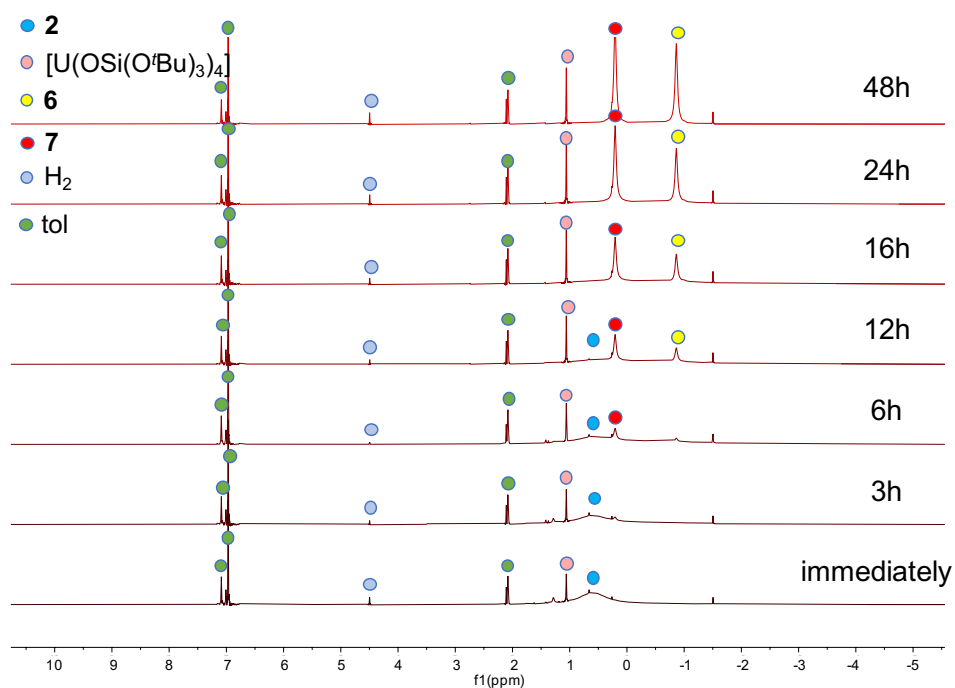

**Figure S25.**  $^1\text{H}$  NMR spectra (400 MHz, 298K,  $d_8$ -toluene) showing the evolution of the reaction mixture between complex **2** and 1 atm of  $\text{H}_2$  forming the complexes **6** and **7**

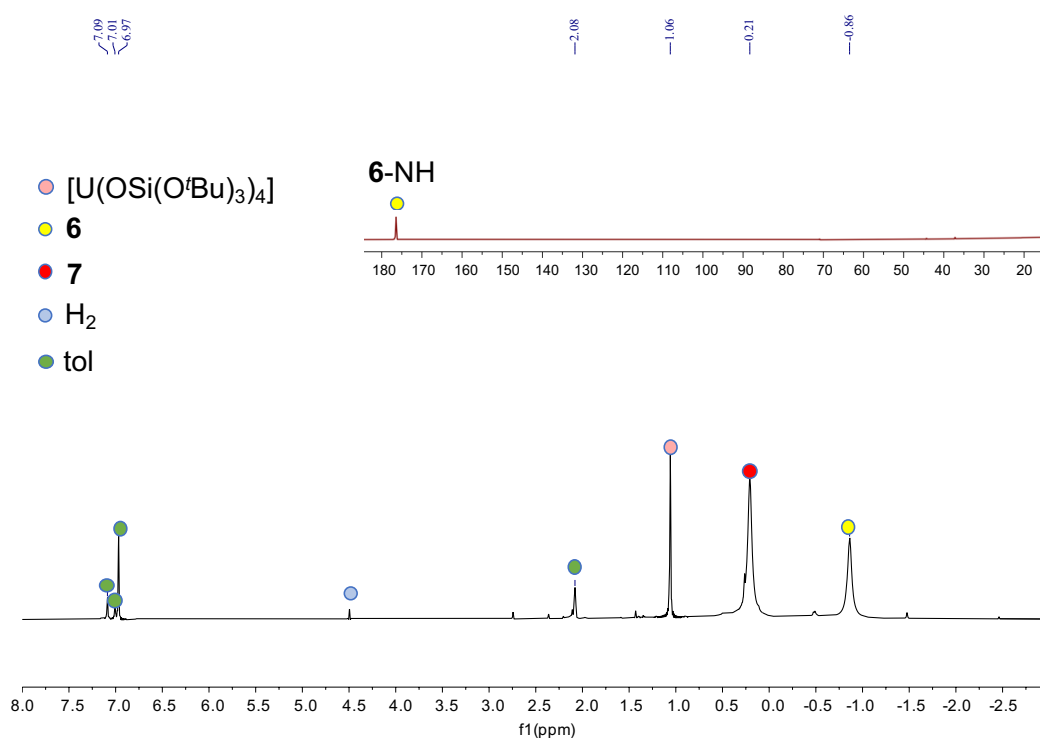

**Figure S26.**  $^1\text{H}$  NMR spectrum (400 MHz, 298K,  $d_8$ -toluene) of the reaction mixture between complex **2** and 1 atm of  $\text{H}_2$  after 2d. The inset shows the peaks of the NH protons of **6**. The NH protons of the complex **7** could not be identified in  $d_8$ -toluene.

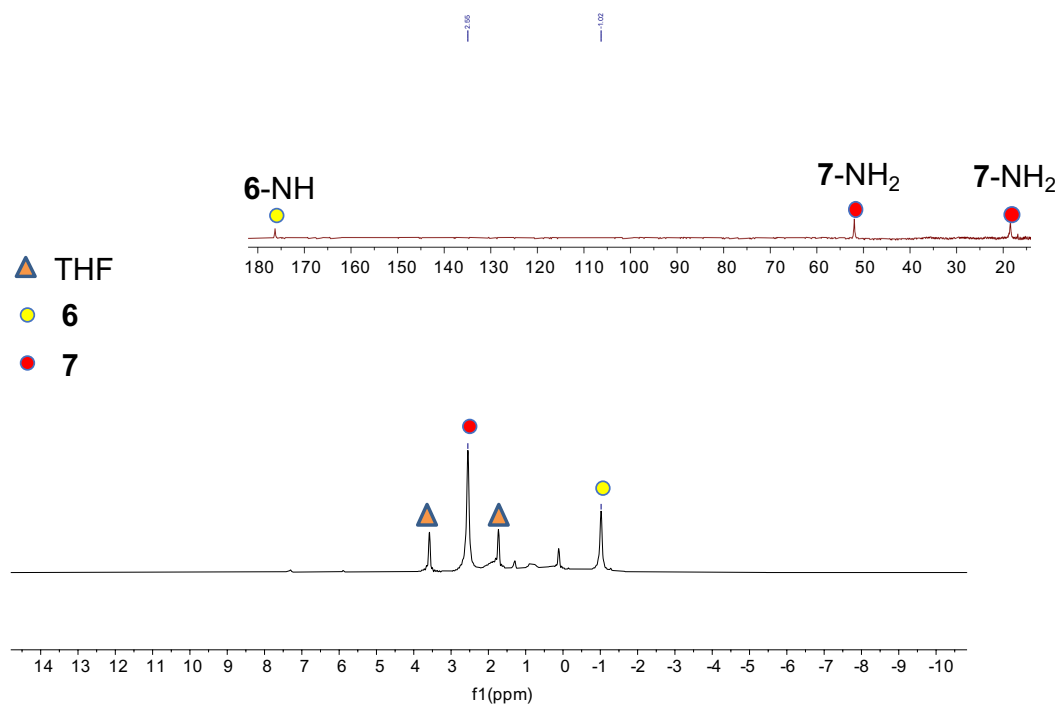

**Figure S27.** <sup>1</sup>H NMR spectrum (400 MHz, 298K, *d*<sub>8</sub>-thf) of the reaction mixture between complex **2** and 1 atm of H<sub>2</sub> after 2d. The inset shows the peaks of the NH protons of **6** and **7**.

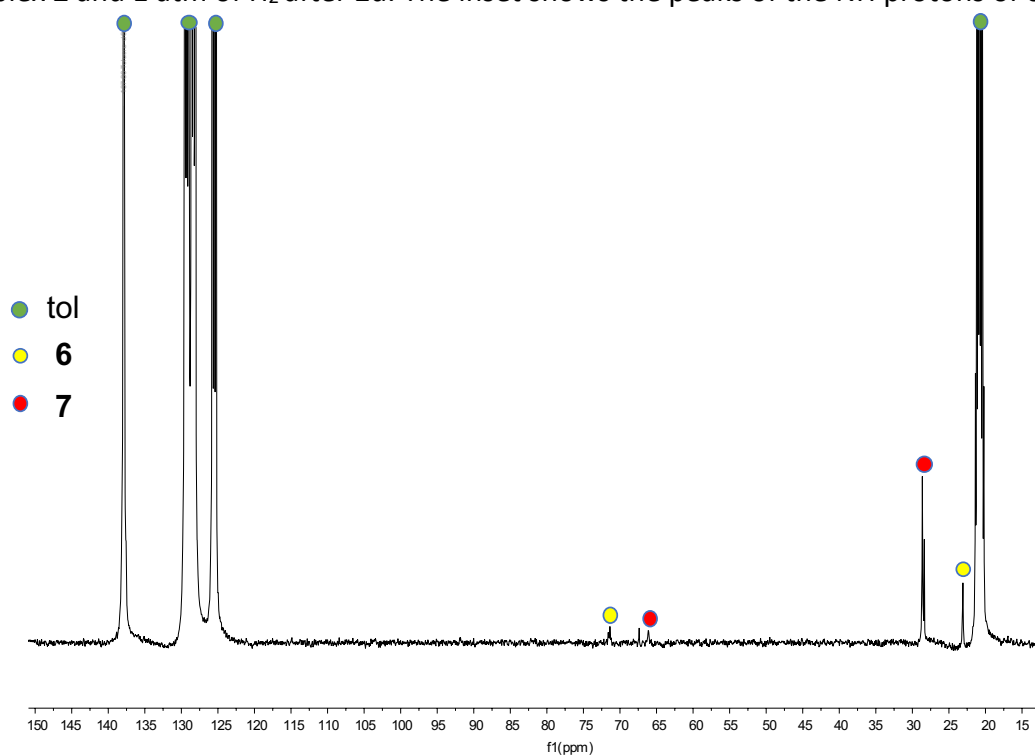

**Figure S28.** <sup>13</sup>C NMR spectrum (100 MHz, 298K, *d*<sub>8</sub>-toluene) of the reaction mixture between complex **2** and 1 atm of H<sub>2</sub> after 2d.

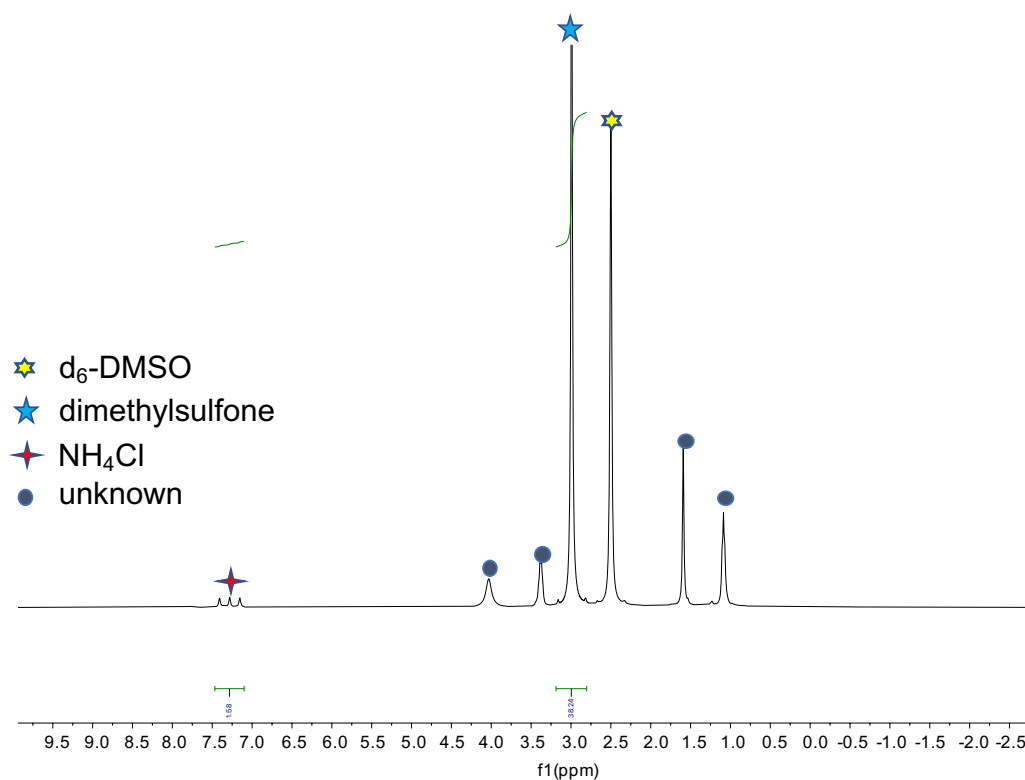

**Figure S29.** <sup>1</sup>H NMR spectrum (400 MHz, 298K, *d*<sub>6</sub>-dmso) after addition of excess 2M HCl (Et<sub>2</sub>O) to the residue obtained after evaporation of the reaction mixture obtained after reacting **2** with 1 atm of H<sub>2</sub> for 2 days.

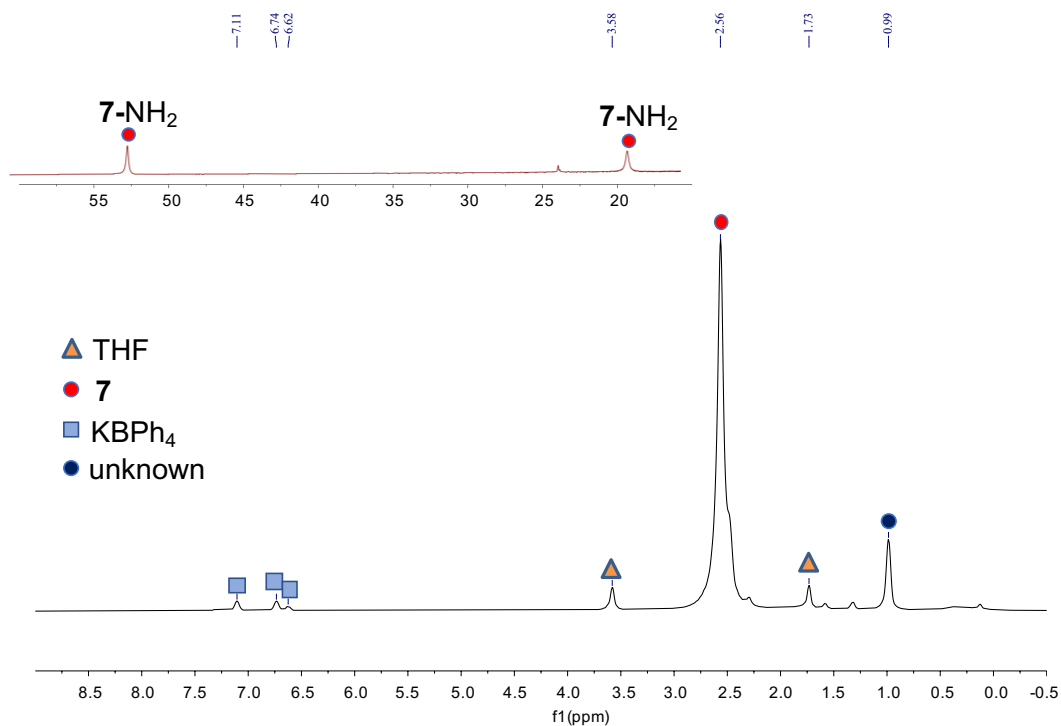

**Figure S30.** <sup>1</sup>H NMR spectrum (400 MHz, 298K, *d*<sub>8</sub>-thf) of the reaction mixture between complex **6** and 2 equiv of NEt<sub>3</sub>HBPh<sub>4</sub> forming complex **7**.

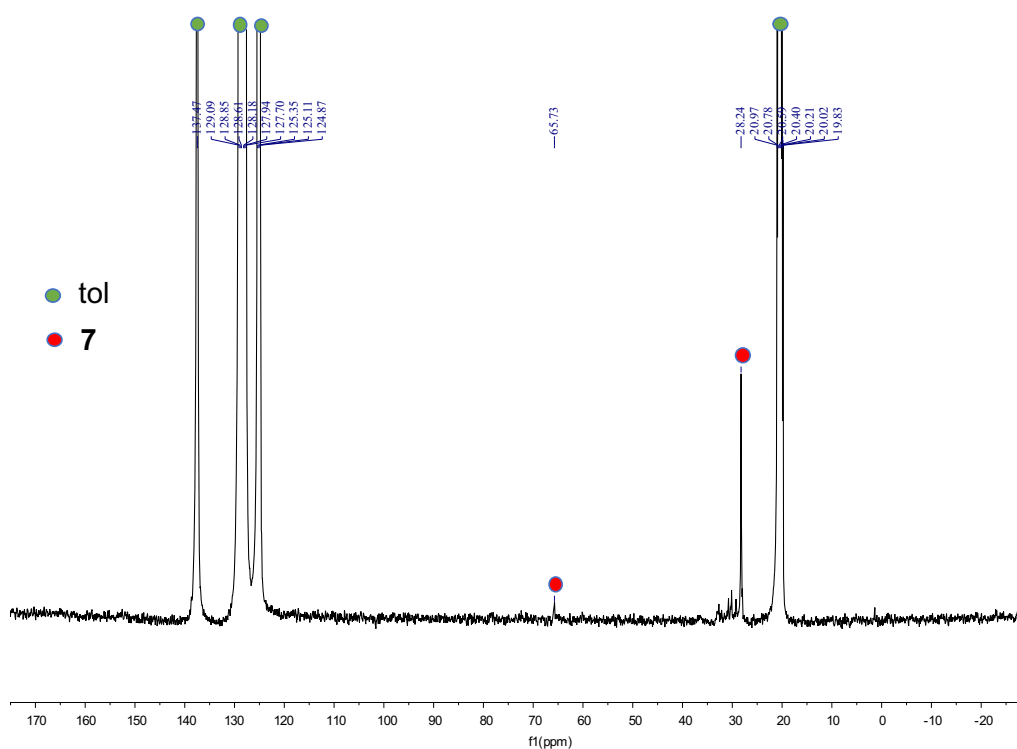

**Figure S31.**  $^{13}\text{C}$  NMR spectrum (100 MHz, 298K,  $d_8$ -toluene) of isolated complex **7**.

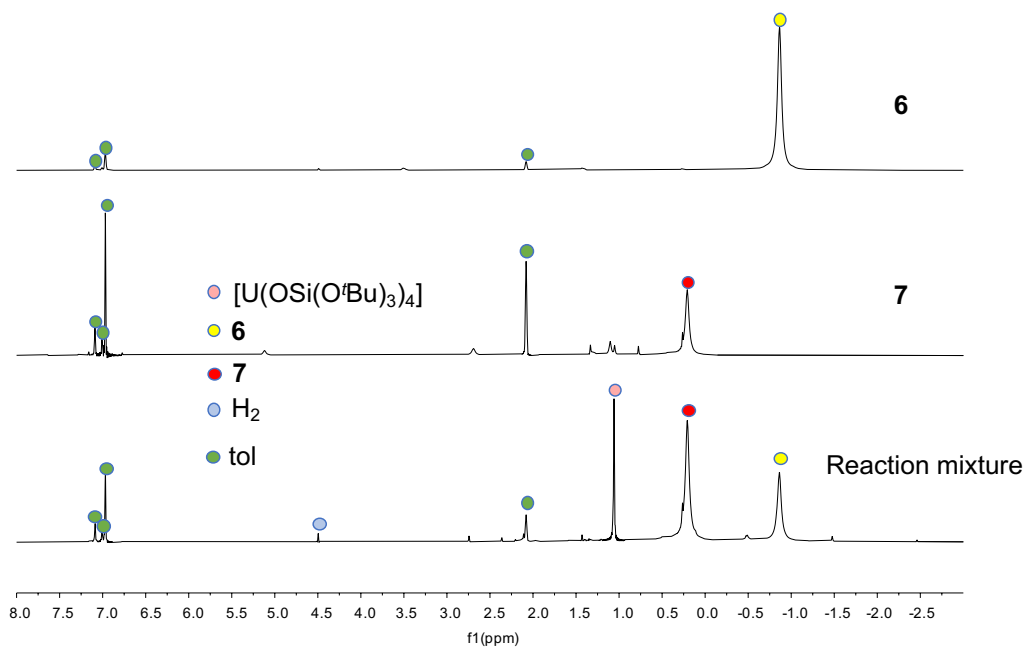

**Figure S32.**  $^1\text{H}$  NMR spectra (400 MHz, 298K,  $d_8$ -toluene) in the -3 to 8 ppm range of the reaction mixture obtained after reacting **2** with 1 atm of  $\text{H}_2$  for 2 days (bottom), of the isolated complex **7** (middle), and of the isolated complex **6** (top).

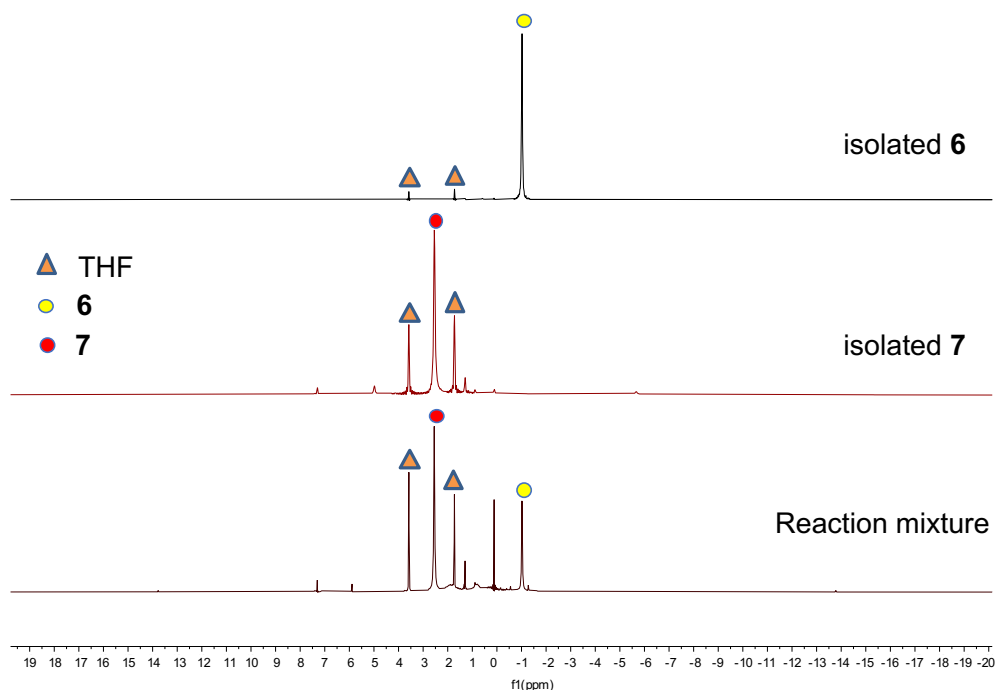

**Figure S33.**  $^1\text{H}$  NMR spectra (400 MHz, 298K,  $d_8$ -thf) (zoom in the 20 to -20 ppm range) of the reaction mixture obtained after reacting **2** with 1 atm of  $\text{H}_2$  for 2 days (bottom), of the isolated complex **7** (middle), and of the isolated complex **6** (top).

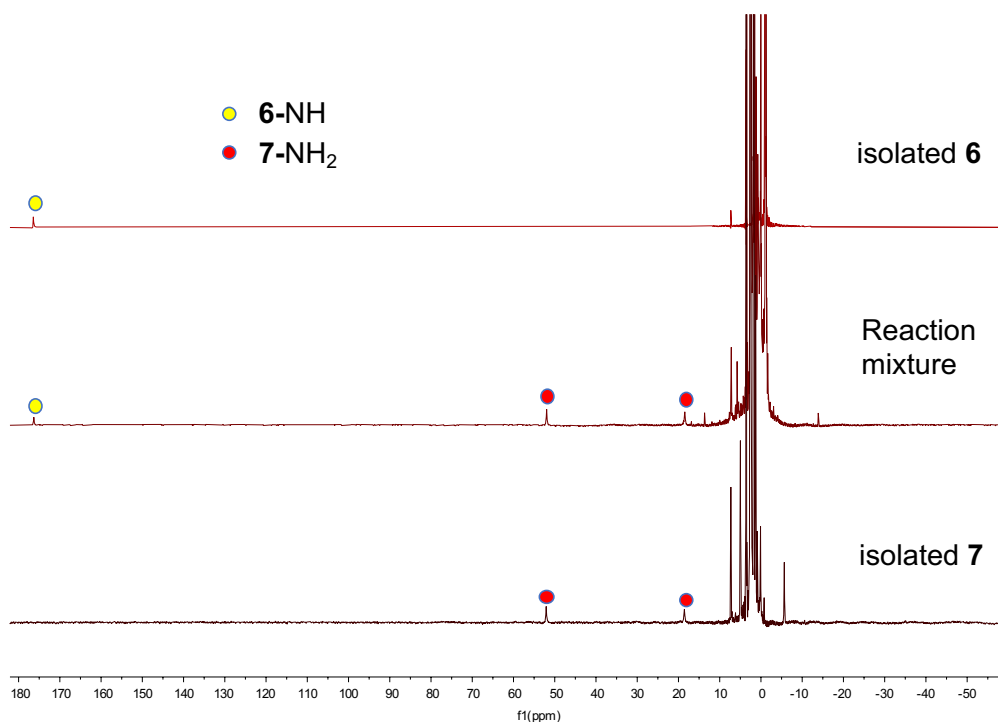

**Figure S34.**  $^1\text{H}$  NMR spectra (400 MHz, 298K,  $d_8$ -thf) of the reaction mixture obtained after reacting **2** with 1 atm of  $\text{H}_2$  for 2 days (middle), of the isolated complex **7** (bottom), and of the isolated complex **6** (top).

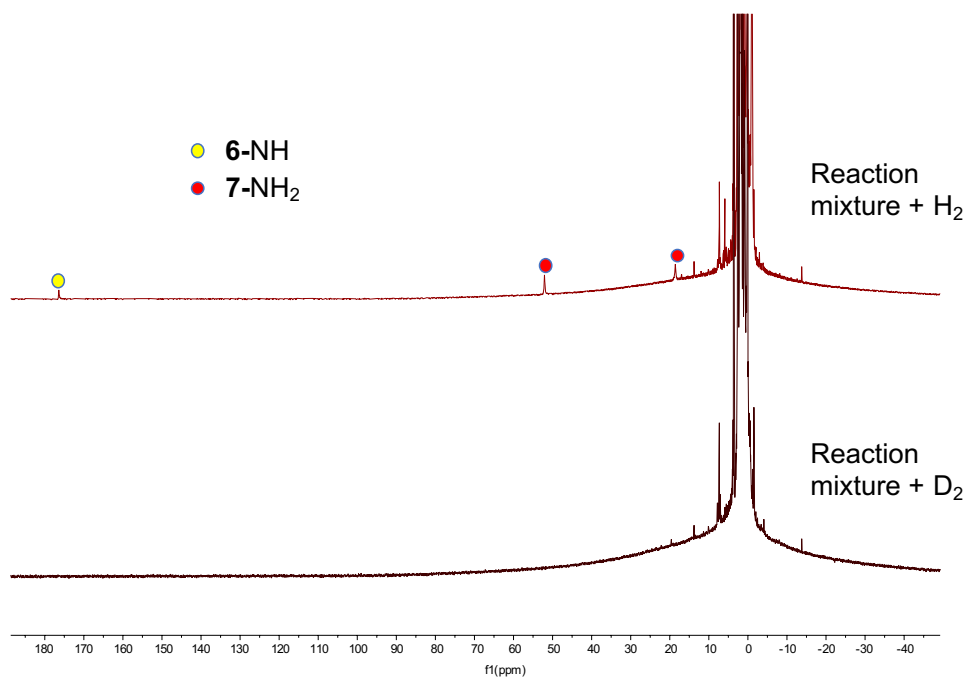

**Figure S35.**  $^1\text{H}$  NMR spectra (400 MHz, 298K,  $d_8$ -thf) of the reaction mixture between **2** + 1 atm of  $\text{D}_2$  (bottom) and **2** + 1 atm of  $\text{H}_2$  (top) after 2 days showing the disappearance of the NH and  $\text{NH}_2$  signals .

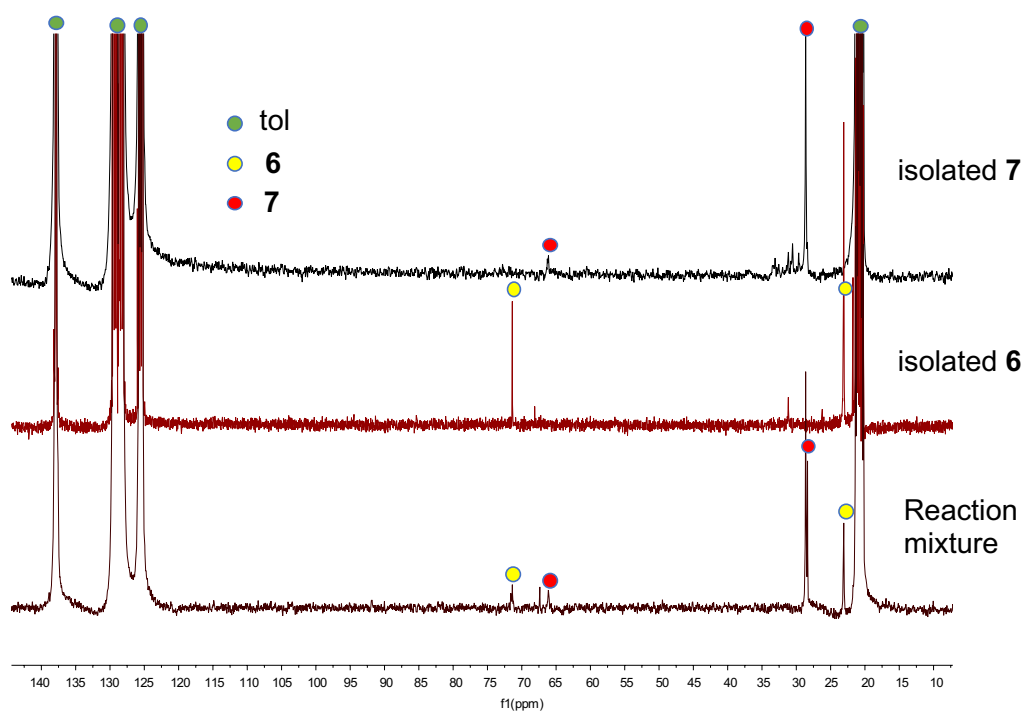

**Figure S36.**  $^{13}\text{C}$  NMR spectra (100 MHz, 298K,  $d_8$ -toluene) comparison of the reaction mixture between **2** and 1 atm of  $\text{H}_2$  after 2 days, isolated complex **6**, and isolated complex **7**.

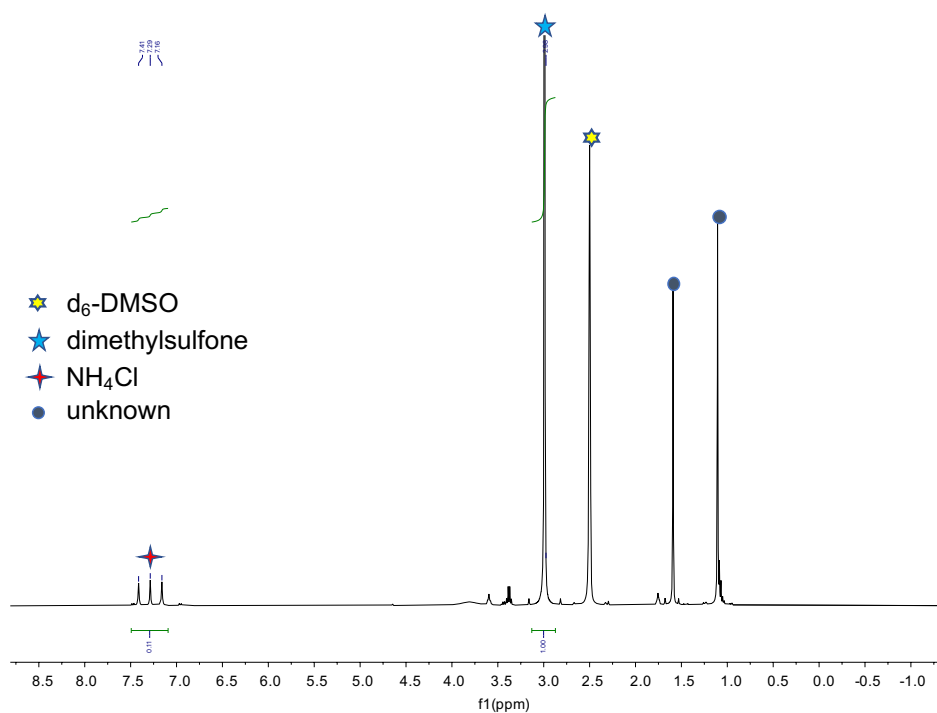

**Figure S37.** <sup>1</sup>H NMR spectrum (400 MHz, 298K, d<sub>6</sub>-dmsO) of the residue after evaporation of the addition of excess 2M HCl (Et<sub>2</sub>O) to isolated complex **4**

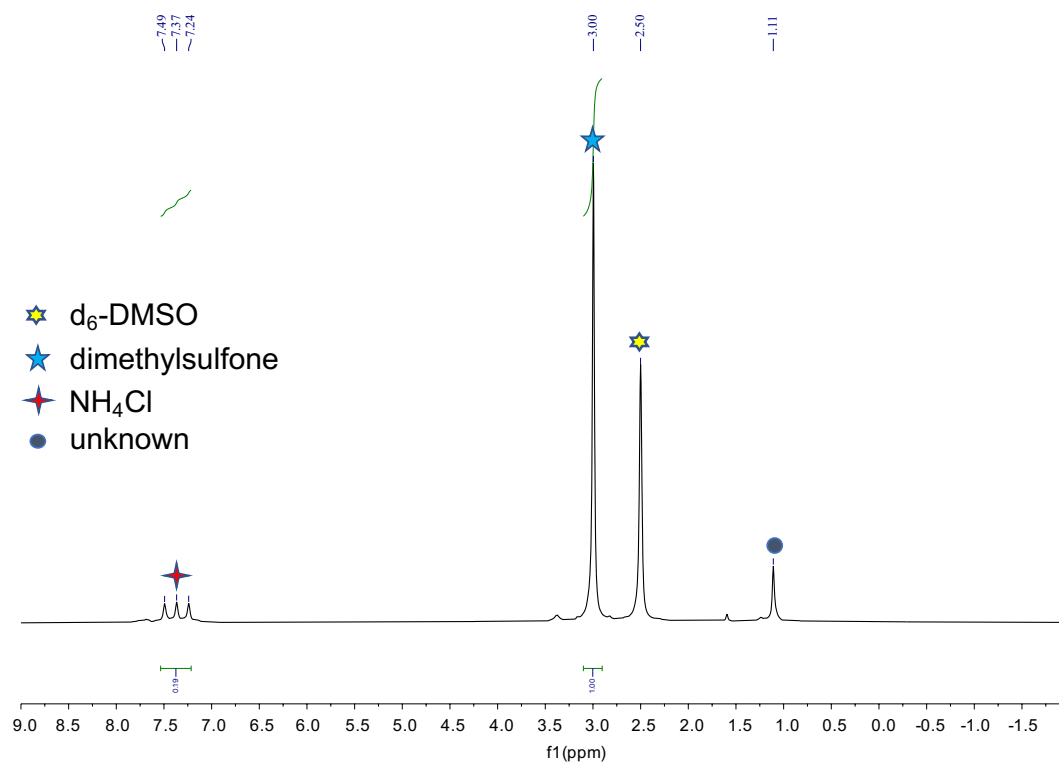

**Figure S38.** <sup>1</sup>H NMR spectrum (400 MHz, 298K, d<sub>6</sub>-dmsO) of the residue after evaporation of the addition of excess 2M HCl (Et<sub>2</sub>O) to isolated complex **2**

## X-ray Crystallographic Details and Refinement Data

The diffraction data for the analysed crystal structures were collected at low temperature using Cu (**3**, **7**) or Mo (**2**, **4**, **5**)  $\lambda = 0.71073$  Å radiation on a Rigaku SuperNova dual system in combination with Atlas type CCD detector. The data reduction and correction were carried out by *CrysAlis<sup>Pro</sup>*.<sup>4</sup>

The solutions and refinements were performed by *SHELXT*<sup>5</sup> and *SHELXL*,<sup>6</sup> respectively. The crystal structures were refined using full-matrix least-squares based on  $F^2$  with all non-H atoms defined in anisotropic manner. Hydrogen atoms were placed in calculated positions by means of the “riding” model.

All compounds displayed disordered ligands. The extent of disorder involved the entire ligand or part of it. Several restraints were needed to model the geometry and displacement atomic parameters of the different orientations. In the case of compound **3**, the 2 nitrides and iodine are disordered over three positions and some strict restraints and constraints have been employed to adjust their occupancies, bond distances and ellipsoids. Due to the high degree of disorder, the free solvent molecules (toluene or THF) were removed in all crystal structures except **7** by applying the *SQUEEZE* algorithm of *PLATON*.<sup>7</sup>

**Table S1.** Crystal data and structural refinement parameters for complexes [K{U(OSi(O<sup>t</sup>Bu)<sub>3</sub>)<sub>3</sub>(μ-N)}<sub>2</sub>], **2**, [K<sub>2</sub>{U(OSi(O<sup>t</sup>Bu)<sub>3</sub>)<sub>3</sub>}<sub>2</sub>(μ-N)<sub>2</sub>(μ-I)], **3**, and [{U(OSi(O<sup>t</sup>Bu)<sub>3</sub>)<sub>3</sub>}<sub>2</sub>(μ-N)<sub>2</sub>(μ-thf)], **4**

|                                                  | <b>2</b>                                                                                        | <b>3</b>                                                                                                       | <b>4</b>                                                                                       |
|--------------------------------------------------|-------------------------------------------------------------------------------------------------|----------------------------------------------------------------------------------------------------------------|------------------------------------------------------------------------------------------------|
| Formula                                          | C <sub>72</sub> H <sub>162</sub> KN <sub>2</sub> O <sub>24</sub> Si <sub>6</sub> U <sub>2</sub> | C <sub>72</sub> H <sub>162</sub> IK <sub>2</sub> N <sub>2</sub> O <sub>24</sub> Si <sub>6</sub> U <sub>2</sub> | C <sub>76</sub> H <sub>170</sub> N <sub>2</sub> O <sub>25</sub> Si <sub>6</sub> U <sub>2</sub> |
| Crystal size (mm)                                | 0.50×0.29×0.14                                                                                  | 0.39×0.05×0.05                                                                                                 | 0.83×0.67×0.56                                                                                 |
| Crystal System                                   | triclinic                                                                                       | monoclinic                                                                                                     | monoclinic                                                                                     |
| Space Group                                      | <i>P</i> -1                                                                                     | <i>P</i> 2 <sub>1</sub>                                                                                        | <i>P</i> 2 <sub>1</sub>                                                                        |
| Volume (Å <sup>3</sup> )                         | 5561.21(18)                                                                                     | 5571.5(2)                                                                                                      | 5508.59(17)                                                                                    |
| a (Å)                                            | 13.4396(3)                                                                                      | 13.9014(3)                                                                                                     | 14.1108(3)                                                                                     |
| b (Å)                                            | 17.7067(3)                                                                                      | 18.1586(5)                                                                                                     | 17.5538(3)                                                                                     |
| c (Å)                                            | 25.0094(5)                                                                                      | 22.0984(5)                                                                                                     | 22.2467(4)                                                                                     |
| α (°)                                            | 80.0596(15)                                                                                     | 90                                                                                                             | 90                                                                                             |
| β (°)                                            | 88.3887(15)                                                                                     | 92.822(2)                                                                                                      | 91.4964(17)                                                                                    |
| γ (°)                                            | 71.6290(16)                                                                                     | 90                                                                                                             | 90                                                                                             |
| Z                                                | 2                                                                                               | 2                                                                                                              | 2                                                                                              |
| Formula Weight                                   | 2123.73                                                                                         | 2289.80                                                                                                        | 2156.73                                                                                        |
| Density (g cm <sup>-3</sup> )                    | 1.268                                                                                           | 1.365                                                                                                          | 1.300                                                                                          |
| μ (mm <sup>-1</sup> )                            | 3.066                                                                                           | 12.045                                                                                                         | 3.060                                                                                          |
| F(000)                                           | 2174                                                                                            | 2318                                                                                                           | 2216                                                                                           |
| Temperature (K)                                  | 140.00(10)                                                                                      | 140.00(10)                                                                                                     | 140.00(10)                                                                                     |
| Total Reflections                                | 62738                                                                                           | 107607                                                                                                         | 78955                                                                                          |
| Unique Reflections                               | 26553                                                                                           | 21762                                                                                                          | 22528                                                                                          |
| R <sub>int</sub>                                 | 0.0319                                                                                          | 0.0698                                                                                                         | 0.0467                                                                                         |
| R Indices [I > 2σ(I)]                            | R <sub>1</sub> = 0.0461<br>wR <sub>2</sub> = 0.1071                                             | R <sub>1</sub> = 0.0481<br>wR <sub>2</sub> = 0.1200                                                            | R <sub>1</sub> = 0.0697<br>wR <sub>2</sub> = 0.1877                                            |
| Largest Diff. Peak and Hole (e.Å <sup>-3</sup> ) | 4.664 and -1.598                                                                                | 1.693 and -1.328                                                                                               | 5.384 and -1.371                                                                               |
| GOF                                              | 1.036                                                                                           | 1.043                                                                                                          | 1.014                                                                                          |

F(000), structure factor evaluated in the zeroth-order case, h=k=l= 0; R(int) =  $\sum |F_o2 - F_o2(\text{mean})| / \sum [F_o2]$ ; I, measured intensities; 'Largest diff. peak and hole', maximum and minimum electron density found in the final Fourier difference map; GOF, goodness of fit (=  $\{\sum [w(F_o2 - F_c2)^2] / (n - p)\}^{1/2}$ , where n is the number of reflections and p is the total number of parameters refined).

**Table S2.** Crystal data and structural refinement parameters for complexes [U(OSi(O<sup>t</sup>Bu)<sub>3</sub>)<sub>3</sub>Cl(thf)<sub>2</sub>], **5** and [U(OSi(O<sup>t</sup>Bu)<sub>3</sub>)<sub>3</sub>]<sub>2</sub>(μ-NH<sub>2</sub>)<sub>2</sub>], **7**

|                                                  | <b>5</b>                                                            | <b>7</b>                                                                                       |
|--------------------------------------------------|---------------------------------------------------------------------|------------------------------------------------------------------------------------------------|
| Formula                                          | C <sub>44</sub> H <sub>97</sub> ClO <sub>14</sub> Si <sub>3</sub> U | C <sub>80</sub> H <sub>184</sub> N <sub>2</sub> O <sub>26</sub> Si <sub>6</sub> U <sub>2</sub> |
| Crystal size (mm)                                | 0.66×0.48×0.36                                                      | 0.35×0.25×0.21                                                                                 |
| Crystal System                                   | monoclinic                                                          | monoclinic                                                                                     |
| Space Group                                      | <i>Cc</i>                                                           | <i>P2</i> <sub>1</sub>                                                                         |
| Volume (Å <sup>3</sup> )                         | 12855.6(2)                                                          | 5594.49(9)                                                                                     |
| a (Å)                                            | 24.6881(3)                                                          | 14.34057(14)                                                                                   |
| b (Å)                                            | 14.15493(12)                                                        | 17.69858(18)                                                                                   |
| c (Å)                                            | 38.5283(4)                                                          | 22.05000(18)                                                                                   |
| α (°)                                            | 90                                                                  | 90                                                                                             |
| β (°)                                            | 107.2905(11)                                                        | 91.5214(8)                                                                                     |
| γ (°)                                            | 90                                                                  | 90                                                                                             |
| Z                                                | 8                                                                   | 2                                                                                              |
| Formula Weight                                   | 1207.96                                                             | 2234.88                                                                                        |
| Density (g cm <sup>-3</sup> )                    | 1.248                                                               | 1.327                                                                                          |
| μ (mm <sup>-1</sup> )                            | 2.671                                                               | 9.201                                                                                          |
| F(000)                                           | 4992                                                                | 2308                                                                                           |
| Temperature (K)                                  | 140.00(10)                                                          | 140.00(10)                                                                                     |
| Total Reflections                                | 166080                                                              | 69237                                                                                          |
| Unique Reflections                               | 43877                                                               | 22639                                                                                          |
| R <sub>int</sub>                                 | 0.0489                                                              | 0.0346                                                                                         |
| R Indices [I > 2σ(I)]                            | R <sub>1</sub> = 0.0455<br>wR <sub>2</sub> = 0.0997                 | R <sub>1</sub> = 0.0382<br>wR <sub>2</sub> = 0.0940                                            |
| Largest Diff. Peak and Hole (e.Å <sup>-3</sup> ) | 1.462 and -2.753                                                    | 2.016 and -2.307                                                                               |
| GOF                                              | 1.057                                                               | 1.022                                                                                          |

F(000), structure factor evaluated in the zeroth-order case, h=k=l= 0; R(int) =  $\sum |F_o2 - F_o2(\text{mean})| / \sum [F_o2]$ ; I, measured intensities; 'Largest diff. peak and hole', maximum and minimum electron density found in the final Fourier difference map; GOF, goodness of fit (=  $\{\sum [w(F_o2 - F_c2)^2] / (n - p)\}^{1/2}$ , where n is the number of reflections and p is the total number of parameters refined).

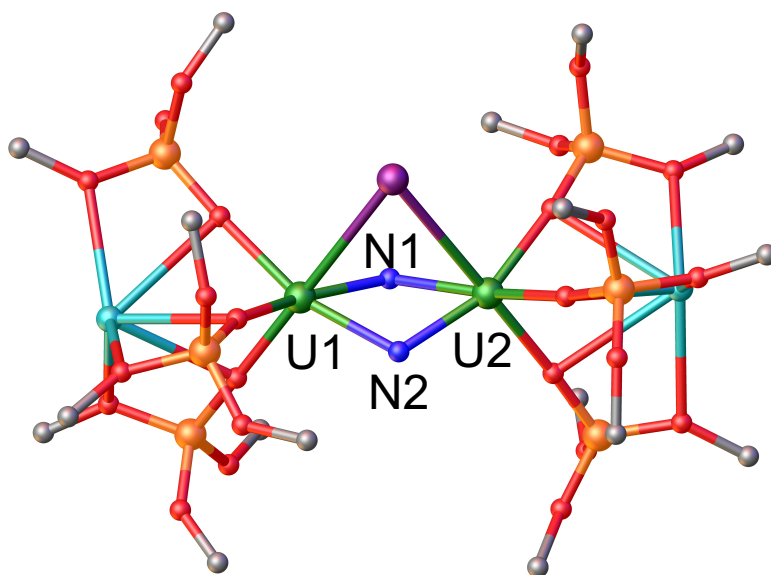

**Figure S39.** Molecular structure of  $[K_2\{U(OSi(O^tBu)_3)_3\}_2(\mu-N)_2(\mu-I)]$ , **3**, with thermal ellipsoids drawn at the 50% probability level. Hydrogen atoms and two molecules of toluene have been omitted for clarity. The two nitrogen and the iodine atoms in the core are disordered over three positions each. Only one position is shown for clarity. The average U-I distance is of 3.197(1) Å.

### Structural description of complex 5

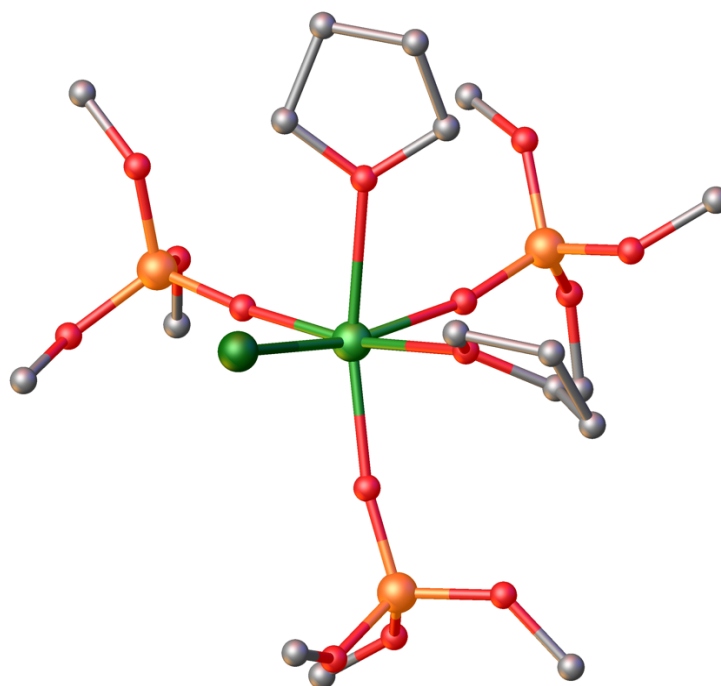

**Figure S40.** Molecular structure of  $[\text{U}(\text{OSi}(\text{O}^t\text{Bu})_3)_2\text{Cl}(\text{thf})_2]$ , **5**, with thermal ellipsoids drawn at the 50% probability level. Hydrogen atoms and two molecules of toluene have been omitted for clarity.

The molecular structure of the complex  $[\text{U}(\text{OSi}(\text{O}^t\text{Bu})_3)_2\text{Cl}(\text{thf})_2]$ , **5** shows a monomeric U(IV) complex. The U centre is hexacoordinated in a distorted octahedral geometry and is bound to three siloxide, two thf, and one chloride ligand. The average U-O<sub>sil</sub> distance is of 2.14(1) Å and the U-Cl bond average distance is of 2.694(2) Å.

## IR Spectra

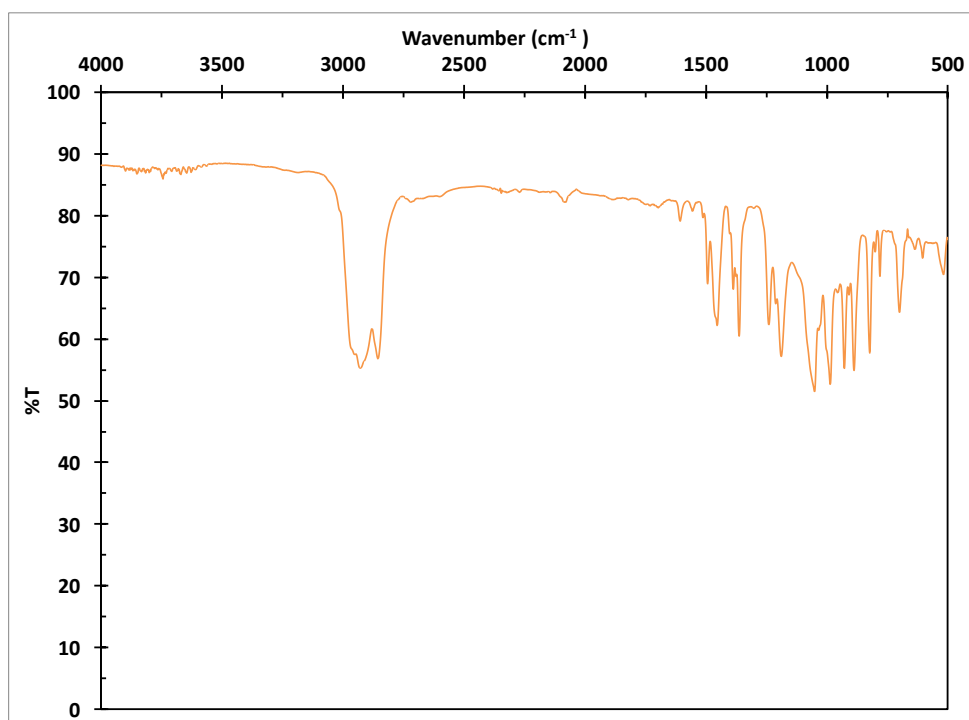

**Figure S41:** IR spectrum of isolated complex **1** in a Nujol suspension measured on KBr windows

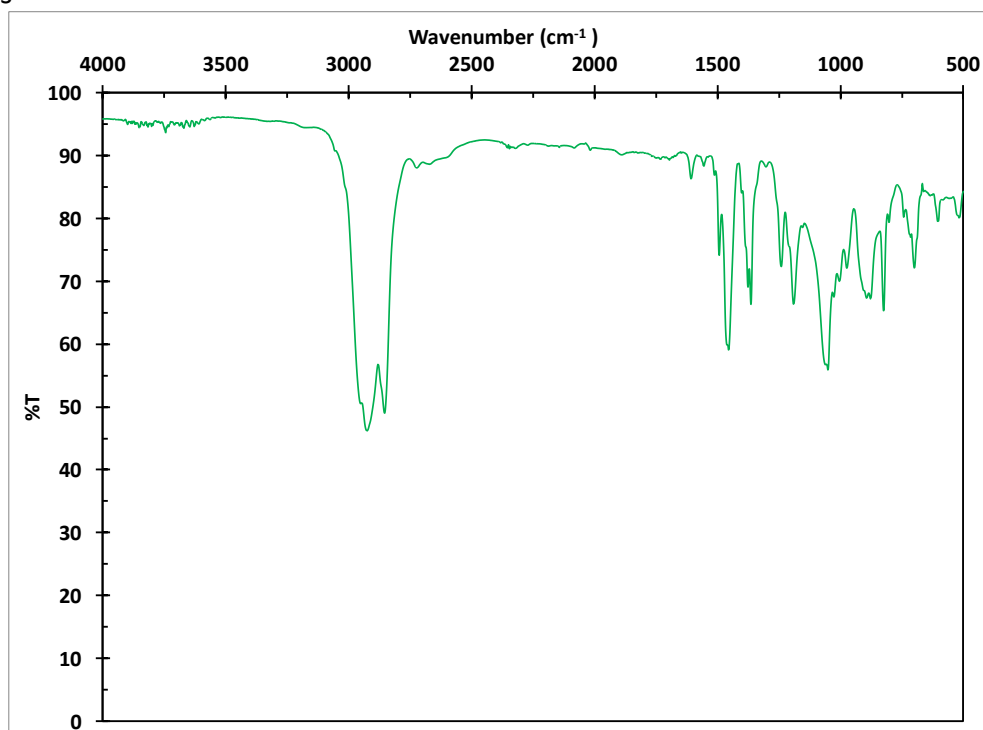

**Figure S42:** IR spectrum of isolated complex **2** in a Nujol suspension measured on KBr windows

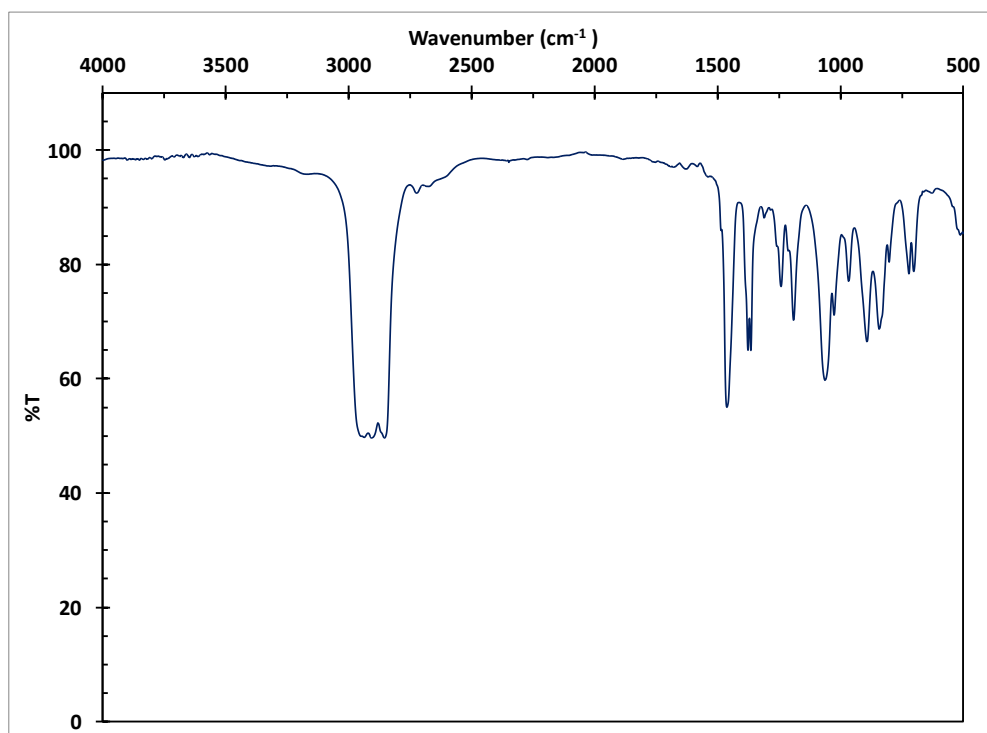

**Figure S43:** IR spectrum of isolated complex **4** in a Nujol suspension measured on KBr windows

## GC-MS experiment

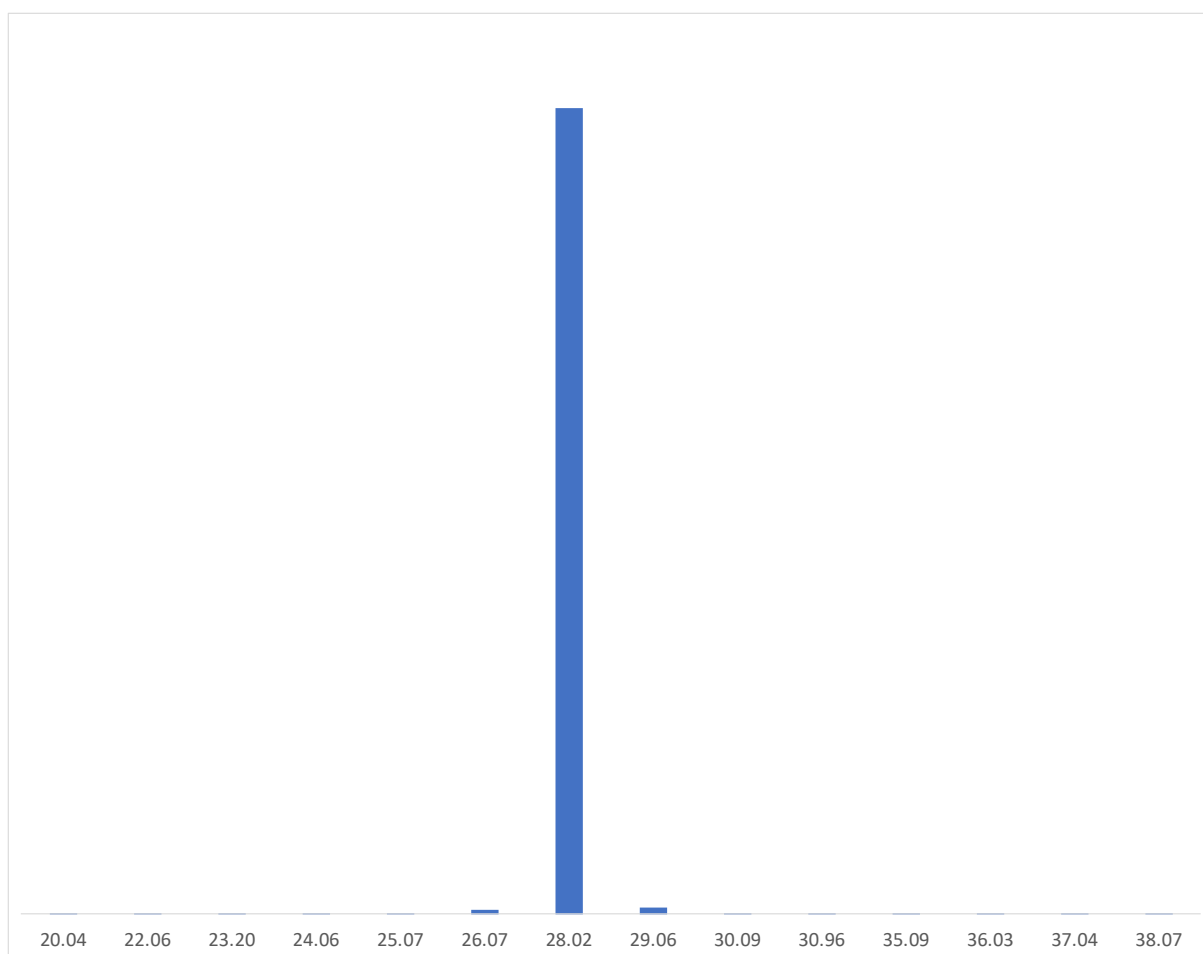

**Figure S44:** N<sub>2</sub> detection after full decomposition of complex **4** under Ar

## Computational Details

Density functional theory (DFT) calculations were performed with Turbomole 7.3.<sup>8</sup> All open-shell calculations were spin unrestricted, using the hybrid functional PBE0.<sup>9,10</sup> The cc-pVDZ basis set was used on all atoms, other than uranium on which cc-pVDZ-PP basis was used<sup>11</sup> (with the associated 60 relativistic effective core potential<sup>12</sup>). Grimme's D3 dampening function was used to account for dispersion interactions.<sup>13</sup> Turbomole's m4 integration grid was used.

Quantum Theory of Atoms-in-Molecules (QTAIM) analyses were performed with AIMALL, with .wfx files generated by Molden2AIM.<sup>14,15</sup> NBO 7.0 was used to obtain natural charges and Wiberg bond indices (WBI) in the natural atomic orbital basis.<sup>16</sup> Molecular orbital visualisation, and intrinsic bonding orbital (IBO) analyses were performed with IBOView.<sup>17</sup> Minimum quality bases for uranium and caesium were constructed from the cc-pVTZ-PP basis, in the same manner as previously described for other elements.<sup>17</sup> Rudel et al. recently used IBO analysis on uranium by constructing Hartree-Fock orbitals from the def-TZVP basis (without polarisation functions) but obtained similar results to cc-pVTZ-PP.<sup>18</sup> The uranium minimum quality basis included 7s, 6p, 6d and 5f valence orbitals. The four-exponent option was used for IBO analysis.

The presence of ITI was not probed computationally because (a) we did not optimise the heavy atom positions and (b) any possible ITI is small and present only for one of the U.

**2** U(VI)/U(V):

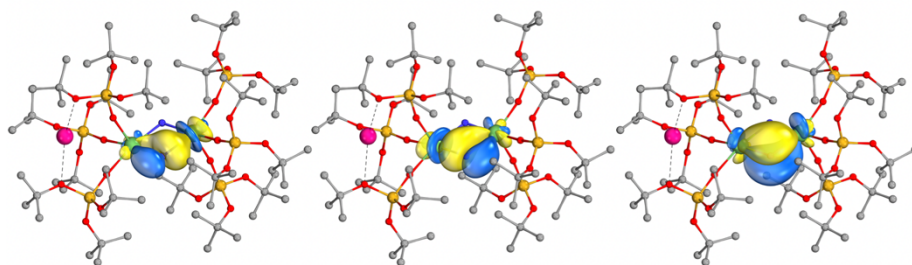

**4** U(VI)/U(VI):

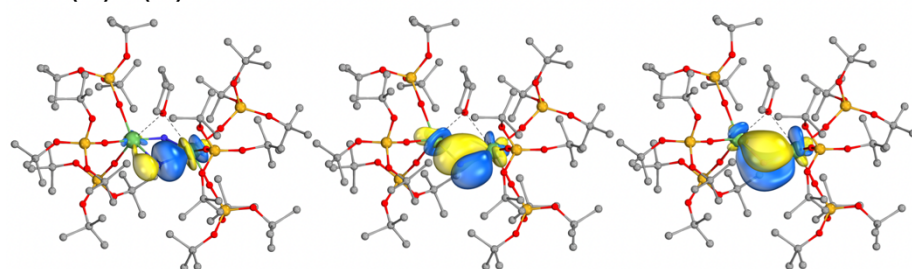

Figure S45:  $\alpha$  spin IBOs of the U<sub>2</sub>N<sub>2</sub> ring in **2** and **4**, on the opposite side of the ring to that shown in Figure 5 of the main text. Due to the  $C_i$  symmetry of **1**, orbitals of the opposite side of the ring are identical. The isosurfaces enclose 90% of the orbital.

## References

1. L. Barluzzi, L. Chatelain, F. Fadaei-Tirani, I. Zivkovic and M. Mazzanti, *Chem. Sci.*, 2019, **10**, 3543 - 3555.
2. J. K. Peterson, M. R. MacDonald, J. W. Ziller and W. J. Evans, *Organometallics*, 2013, **32**, 2625-2631.
3. R. F. Jordan, C. S. Bajgur, W. E. Dasher and A. L. Rheingold, *Organometallics*, 1987, **6**, 1041-1051.
4. CrysAlisPRO, *Rigaku Oxford Diffraction*, release 1.171.41.96a 2021.
5. G. M. Sheldrick, *Acta Crystallogr., Sect. A*, 2015, **71**, 3-8.
6. G. M. Sheldrick, *Acta Crystallogr. C*, 2015, **71**, 3-8.
7. PLATON and A. L. Spek, *Acta Crystallogr. Sect. D*, 2009, **65**, 148-155.
8. F. Furche, R. Ahlrichs, C. Hättig, W. Klopper, M. Sierka and F. Weigend, *WIREs Comput Mol Sci* 2014, 4:91–100
9. J. P. Perdew, K. Burke, M. Ernzerhof, *Phys. Rev. Lett.*, 1996, **77**, 3865
10. J. P. Perdew, and M. Ernzerhof, *J. Chem. Phys*, 1996, **105**, 9982
11. K. A. Peterson, *J. Chem. Phys*, 2015, **142**, 074105
12. M. Dolg and X. Cao, *J. Phys. Chem. A*, 2009, **113**, 45, 12573–12581
13. S. Grimme, J. Antony, S. Ehrlich and H. Krieg, *J. Chem. Phys*, 2010, **132**, 154104
14. AIMAll (Version 19.10.12), Todd A. Keith, *TK Gristmill Software, Overland Park KS, USA*, 2019 (aim.tkgristmill.com)
15. W. Zou, D. Nori-Shargh, J. E. Boggs, *J. Phys. Chem. A* 2013, **117**, 1, 207–212
16. E. D. Glendening, C.R Landis, F. Weinhold, *J. Comput. Chem.*, 2019, **40**, 2234-2241
17. G. Knizia, *J. Chem. Theory Comput.* 2013, 9, 11, 4834–4843
18. S. S. Rudel, H. L. Deubner, M. Muller, A. J. Karttunen and F. Kraus, *Nat. Chem.*, 2020, **12**, 962-967
